Running title: Pangenome of sugar beet and crop wild relatives

# Pangenome of cultivated beet and crop wild relatives reveals parental relationships of a tetraploid wild beet

Katharina Sielemann<sup>1,2</sup>, Nicola Schmidt<sup>3</sup>, Jonas Guzik,<sup>1</sup> Natalie Kalina<sup>1</sup>, Boas Pucker<sup>1,4</sup>, Prisca Viehöver<sup>1</sup>, Sarah Breitenbach<sup>3</sup>, Bernd Weisshaar<sup>1</sup>, Tony Heitkam<sup>3</sup>, Daniela Holtgräwe<sup>1\*</sup>

<sup>1</sup>Genetics and Genomics of Plants, Center for Biotechnology (CeBiTec) & Faculty of Biology, Bielefeld University, 33615 Bielefeld, Germany

<sup>2</sup>Graduate School DILS, Bielefeld Institute for Bioinformatics Infrastructure (BIBI), Bielefeld University, 33615 Bielefeld, Germany

<sup>3</sup>Faculty of Biology, Institute of Botany, Technische Universität Dresden, 01069 Dresden, Germany

<sup>4</sup>Plant Biotechnology and Bioinformatics, Institute of Plant Biology & Braunschweig Integrated Centre of Systems Biology (BRICS), TU Braunschweig, 38106 Braunschweig, Germany

\* Correspondence: [dholtgra@cebitec.uni-bielefeld.de](mailto:dholtgra@cebitec.uni-bielefeld.de)

## Abstract

Most crop plants, including sugar beet (*Beta vulgaris* subsp. *vulgaris*), suffer from domestication bottlenecks and low genetic diversity caused by extensive selection for few traits. However, crop wild relatives (CWRs) harbour useful traits relevant for crop improvement, including enhanced adaptation to biotic and abiotic stresses.

Especially polyploids are interesting from an evolutionary perspective as genes undergo reorganisation after the polyploidisation event. Through neo- and subfunctionalisation, novel functions emerge, which enable plants to cope with changing environments and extreme/harsh conditions. Particularly in the face of climate change, specific stress and pathogen resistances or tolerances gain importance. To introduce such traits into breeding material, CWRs have already been identified as an important source for sustainable breeding. The identification of genes underlying traits of interest is crucial for crop improvement.

For beets, the section *Corollinae* contains the tetraploid species *Beta corolliflora* ( $2n=4x=36$ ) that harbours salt and frost tolerances as well as a wealth of pathogen resistances. The number of beneficial traits of *B. corolliflora* is increased compared to those of the known diploids in this section (all  $2n=2x=18$ ). Nevertheless, neither the parental relationships of *B. corolliflora* have been resolved, nor are genomic resources available to steer sustainable, genomics-informed breeding.

To benefit from the resources offered by polyploid beet wild relatives, we generated a comprehensive pangenome dataset including *B. corolliflora*, *Beta lomatogona*, and *Beta macrorhiza*, as well as a more distant wild beet *Patellifolia procumbens* ( $2n=2x=18$ ). Joined analyses with publicly available genome sequences of two additional wild beets allowed the identification of genomic regions absent from cultivated beet, providing a sequence database harbouring traits relevant for future breeding endeavours. In addition, we present strong evidence for the parental relationship of the *B. corolliflora* wild beet as an autotetraploid emerging from *B. macrorhiza*.

## Running title: Pangenome of sugar beet and crop wild relatives

### 40 **Background**

#### 41 **Sugar beet, crop wild relatives and the potential for breeding**

42 The crop plant sugar beet (*Beta vulgaris* subsp. *vulgaris*) is of high economic relevance contributing  
43 to approximately 20% of the global sugar production (Biancardi and Lewellen 2020). To increase  
44 sugar production, early breeding focused mainly on yield. This domestication process introduced a  
45 strong genetic bottleneck resulting in diminished diversity available to breeders (Panella et al. 2020;  
46 Monteiro et al. 2018). Other important traits, like resistances to biotic and abiotic stresses, were  
47 initially neglected but gain more and more relevance in the face of climate change (Ristaino et al.  
48 2021). It was already shown that some sea beets and some wild beets contain agronomically  
49 important traits that were lost during domestication (Biancardi and Lewellen 2020). Examples for such  
50 traits include salt and nematode tolerances (Panella et al. 2020; Cai et al. 1997; Capistrano-  
51 Gossmann et al. 2017). However, other crop wild relatives (CWRs) of sugar beet might harbour even  
52 more potential in terms of traits which can be incorporated to allow more sustainable beet cultivation  
53 (Panella et al. 2020). To this end, we sequenced and assembled the genomes of four different wild  
54 beets, namely *Beta corolliflora*, *Beta lomatogona*, *Beta macrorhiza*, and *Patellifolia procumbens*, for  
55 which no genome sequences were available until now.

#### 56 **Pangenome instead of a single reference to identify 'lost' regions harbouring traits of interest**

57 Several pangenome studies show that deep understanding of traits of interest requires the analysis  
58 of related species, whereas a single reference genome sequence often lacks important information,  
59 e.g. due to presence/absence variations (PAVs) between different species or accessions (Bayer et  
60 al. 2020, 2021). Since a pangenome of a taxonomic group is not static, we use the term pangenome  
61 synonymously with pangenome dataset, comprising sequencing reads, genome assemblies, and  
62 annotations of different related species. In the context of a crop pangenome study, the investigation  
63 of CWRs is of particular interest for breeding endeavours - not only to improve yield, but also to (re-  
64 )introduce regions lost during domestication which encode traits relevant for the defence against biotic  
65 and abiotic stresses. This is increasingly relevant due to climate change. Upcoming climatic  
66 conditions, including higher temperatures and heavy rain or flooding events, may promote favourable  
67 conditions for plant pests and diseases (Ristaino et al. 2021; Jabran et al. 2020). Therefore, we  
68 compared the genome sequences of sugar beet and CWRs to identify regions absent from the *B.*  
69 *vulgaris* subsp. *vulgaris* genome sequence but harbouring important trait-associated genes  
70 presumably relevant for the generation of enhanced varieties through breeding.

#### 71 **Resolving the origin of the polyploid wild beet *Beta corolliflora***

## Running title: Pangenome of sugar beet and crop wild relatives

72 The pangenome is not only of relevance at the gene or functional level, but also provides substantial  
73 insights into the evolution of crops and wild species (Bayer et al. 2020). Especially polyploid  
74 organisms are evolutionarily interesting as genes often undergo reorganisation and neo- or  
75 subfunctionalisation after the polyploidisation event. Novel functions can emerge, enabling the plant  
76 to better adapt to changing environments and stressful conditions (Adams and Wendel 2005; Otto  
77 and Whitton 2000; Van de Peer et al. 2017, 2021). This is not only true for allopolyploids, where the  
78 genomes of two different species are combined, but also for autopolyploids that evolve from one  
79 diploid parent. Despite the extensive niche overlaps of progenitor and descendant, these ploidy  
80 increases can stabilise heterosis, resulting for example in higher adaptability to stress (Van de Peer  
81 et al. 2021; Wang et al. 2013).

82 Regarding beets and wild beets, the section *Corollinae* harbours a range of higher polyploids. Among  
83 them, the most well-known is the tetraploid *Beta corolliflora* ( $2n=4x=36$ ). It harbours a wide range of  
84 beneficial traits, including salt and frost tolerance as well as various resistances against pathogens  
85 (Panella et al. 2020). Yet, the type and origin of its polyploidy remain unclear. Having a diploid  
86 chromosome configuration of  $2n=2x=18$ , *B. lomatogona* and *B. macrorhiza* are considered as  
87 potential parents. In contrast to *B. nana*, these species are the only known diploids of the section  
88 *Corollinae* that show a geographical distribution overlap with *B. corolliflora* (Sielemann et al. 2022).  
89 *B. corolliflora* is therefore considered to be either an allotetraploid resulting from hybridization of *B.*  
90 *lomatogona* and *B. macrorhiza*, or an autotetraploid resulting from a whole genome duplication of only  
91 one of those two species (or closely related to extinct relatives of one of those two species) (Frese  
92 and Ford-Lloyd 2020; Reamon-Büttner et al. 1996). A pangenome resource will be useful to trace the  
93 origin of *B. corolliflora*'s tetraploidy and may provide important insights into the past polyploidisation  
94 event.

## 95 Objective

96 In this study, we present evidence for the tetraploid origin of *B. corolliflora* by generating the first  
97 genome sequence assemblies for four different sugar beet wild relatives - *B. corolliflora* (4x), *B.*  
98 *lomatogona* (2x), *B. macrorhiza* (2x), and as an outgroup *P. procumbens* (2x). These newly available  
99 beet genomic resources, together with the genome sequence of the cultivated sugar beet reference  
100 KWS2320 (assembly version KWS2320ONT v1.0; *B. vulgaris* subsp. *vulgaris*) (Sielemann et al.  
101 2023), sea beet (*B. vulgaris* subsp. *maritima* WB42) (Rodríguez del Río et al. 2019), and *B. patula*  
102 (Rodríguez del Río et al. 2019), were used to gain insights into the beet pangenome by i) employing  
103 cytogenetic, *k*-mer- and gene-based methods to get evidence for the parental relationships of the  
104 tetraploid wild beet *B. corolliflora*, and by ii) identifying 'lost' regions in the cultivated sugar beet  
105 KWS2320 with relevance for breeding.

## Running title: Pangenome of sugar beet and crop wild relatives

106

## 107 Results

### 108 Genome assemblies of wild beets

109 Three long read-based assemblies (*B. corolliflora*: BcorONT v1.0, *B. lomatogona*: BlomONT v1.0,  
110 and *P. procumbens*: PproONT v1.0) and a short read-based assembly (*B. macrorhiza*: Bmrh v1.0) of  
111 wild beet species were generated and serve as additional genomic resources for future analyses and  
112 breeding (Table 1).

113 The largest genome sequence assembly was constructed for the tetraploid *B. corolliflora* with a total  
114 size of approximately 1.96 Gb (Table 1). The genome sequence assemblies of the diploid species *B.*  
115 *lomatogona* and *P. procumbens* have a comparable approximate total assembly size of 1 Gb with  
116 1500 contigs each. The final genome sequence assembly for *B. macrorhiza* comprises 218,216  
117 contigs with a cumulative size of 736 Mb. Here, limited access to leaf material restricted DNA  
118 amounts, resulting in an Illumina-only assembly. All newly generated assemblies exceed the size of  
119 the KWS2320 sugar beet reference genome sequences Refbeet-1.2 and RefBeet-1.5 (Holtgräwe;  
120 Dohm et al. 2014; Minoche et al. 2015).

121

122 **Table 1: Assembly statistics of the new beet genomic resources.** The assemblies of *B. corolliflora*, *B.*  
123 *lomatogona*, and *P. procumbens* are based on long reads, whereas the assembly of *B. macrorhiza* is based on  
124 short reads.

| Species            | <i>B. corolliflora</i>    | <i>B. lomatogona</i>    | <i>P. procumbens</i>    | <i>B. macrorhiza</i>    |
|--------------------|---------------------------|-------------------------|-------------------------|-------------------------|
| Assembly name      | BcorONT v1.0              | BlomONT v1.0            | PproONT v1.0            | Bmrh v1.0               |
| Data type          | ONT                       | ONT                     | ONT                     | Illumina                |
| Assembly size [bp] | 1963,172,020              | 1032,079,534            | 977,011,471             | 736,230,911             |
| Number of contigs  | 4,355                     | 1,530                   | 1,542                   | 218,216                 |
| N50 [bp]           | 720,692                   | 1,746,059               | 1,392,274               | 7,104                   |
| GC content [%]     | 36.79                     | 36.57                   | 36.53                   | 36.38                   |
| Repeat content     | 1,408,234,706 bp (71.73%) | 719,015,079 bp (69.67%) | 664,938,575 bp (68.06%) | 472,886,165 bp (64.23%) |

## Running title: Pangenome of sugar beet and crop wild relatives

|                     |                                                  |                                                  |                                                  |                                                   |
|---------------------|--------------------------------------------------|--------------------------------------------------|--------------------------------------------------|---------------------------------------------------|
| BUSCOs<br>(n: 2326) | C:95.4% [S:22.5%,<br>D:72.9%], F:0.6%,<br>M:4.0% | C:92.8% [S:58.8%,<br>D:34.0%], F:0.6%,<br>M:6.6% | C:90.1% [S:43.8%,<br>D:46.3%], F:2.6%,<br>M:7.3% | C:68.0% [S:63.9%,<br>D:4.1%], F:12.3%,<br>M:19.7% |
|---------------------|--------------------------------------------------|--------------------------------------------------|--------------------------------------------------|---------------------------------------------------|

125

126 In general, all long read-based assemblies show high completeness with BUSCO percentages above  
127 90%. The number of non-single copy (at least duplicated) BUSCOs is substantially higher for the  
128 tetraploid species (72.9%), with most of the complete BUSCOs being triplicated in BcorONT v1.0.

129 The genome assembly sequences of section *Corollinae* species (average of BcorONT v1.0, BlomONT  
130 v1.0, and Bmrh v1.0: 36.58%) show a higher GC content compared to section *Beta* (35.74% in  
131 KWS2320ONT v1.0). In addition, the genome assemblies of *Corollinae* species are substantially  
132 larger compared to species of the section *Beta* (see Table 1). The repeat content is similarly high in  
133 all genome assembly sequences ranging from 64.23% in Bmrh v1.0 to 71.73% in BcorONT v1.0, but  
134 generally higher in species with larger genomes.

### 135 **Resolving parental relationships of tetraploid *B. corolliflora***

136 To demonstrate the power of the wild beet genome sequencing and assemblies, we addressed the  
137 question regarding the parental relationships of tetraploid *B. corolliflora*. For this, we consider three  
138 different hypotheses that target the emergence from *B. lomatogona* and *B. macrorhiza* (Figure 1A).  
139 These hypotheses are: autotetraploidy originating from either diploid *B. lomatogona* (I) or *B.*  
140 *macrorhiza* (II) and allopolyploidy originating from hybridization of both diploid species (III).

141 To better illustrate this question, we first outline how all three genomes compare on a chromosomal  
142 level. This follows a simple rationale: depending on the mechanism of tetraploidization, the  
143 chromosomes from the diploids should be found again in the chromosomal set of the tetraploid. Here,  
144 we show a cytogenetics approach with three probes based on tandemly repeated DNAs (Figure 1;  
145 Supplemental\_File\_S1).

146 The 18S rDNA probe, a widely used cytogenetic mark (Figure 1B-D, blue), distinctly labels four  
147 chromosomes in the tetraploid (Figure 1B) and two chromosomes in the diploids (Figure 1C, 1D),  
148 supporting all three hypotheses. Therefore, as the remaining two probes, we chose tandemly  
149 repeated satellite DNAs that occur solely in wild beets of the *Corollinae* and have potential to inform  
150 about genetic differences between the wild beet species. For beetSat10-pRN1, we observe  
151 hybridization on 32 chromosomes, with many major and moderate signals in *B. corolliflora* (Figure 1B  
152 red; signal counts in Supplemental\_File\_S1). Similarly, beetSat8-BISat1 hybridizes to all  
153 chromosomes with varying intensity (Figure 1B green; signal counts in Supplemental\_File\_S1). Then,  
154 we comparatively hybridized these probes to *B. lomatogona* and *B. macrorhiza* chromosomes (Figure

**Running title: Pangenome of sugar beet and crop wild relatives**

155 1C, 1D; Supplemental\_File\_S1, A) to deduce expected signal counts for each hypothesis and to  
156 calculate how each count varies from the expectation (Supplemental\_File\_S1, B-D). As a result, we  
157 find least variance between the observed and the expected signal counts for hypothesis (II). Hence,  
158 we conclude most cytogenetic support for *B. corolliflora*'s emergence through autotetraploidization of  
159 *B. macrorhiza*, but also acknowledge the limitations of the analysis.

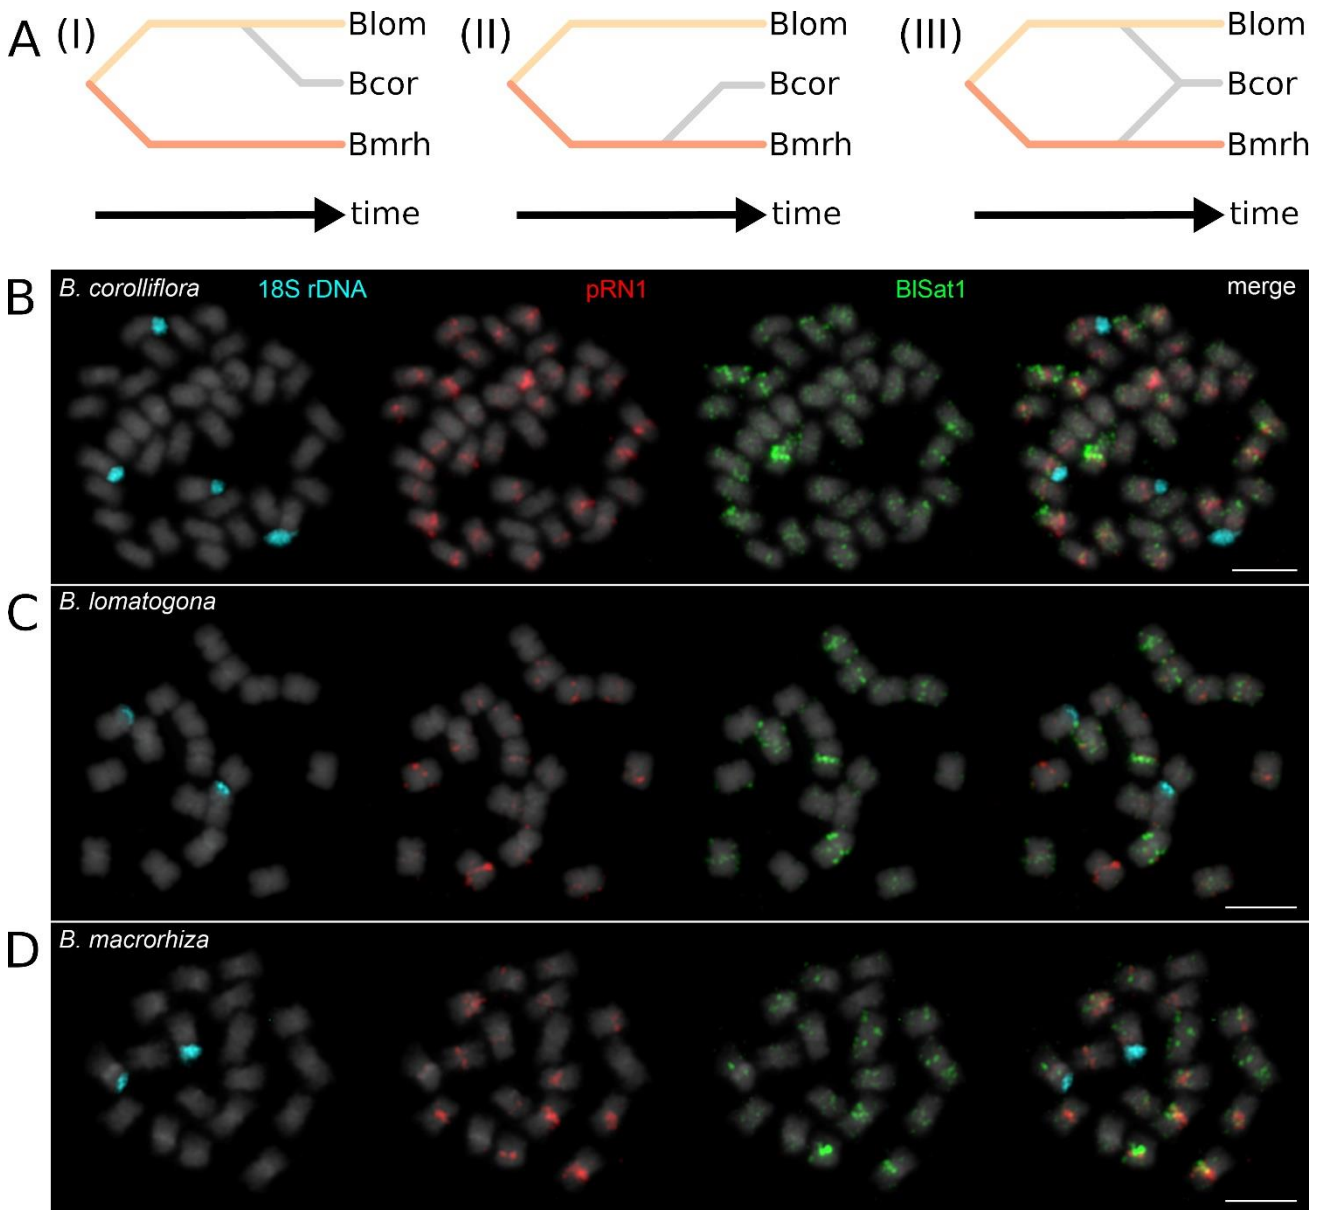

160

161 **Figure 1: Possible parental relationships of tetraploid *B. corolliflora* (Bcor) and their support by**  
162 **cytogenetics.** (A) Hypothesis (I) shows *B. corolliflora* as autotetraploid species with *B. lomatogona* (Blom)  
163 being the single parent species. Hypothesis (II) shows *B. macrorhiza* (Bmrh) as a single parent of autotetraploid  
164 *B. corolliflora* whereas hypothesis (III) considers both parents contributing to allopolyploid *B. corolliflora*. (B-D):  
165 Chromosomal landmarks along mitotic chromosomes of *B. corolliflora*, *B. lomatogona* and *B. macrorhiza*  
166 are not sufficient to unequivocally deduce the parental relationships. Mitotic chromosomes of the wild beets *B.*  
167 *corolliflora* (A), *B. lomatogona* (B), and *B. macrorhiza* (C) were hybridised with probes marking the 18S rDNA

## Running title: Pangenome of sugar beet and crop wild relatives

168 gene (with DY415; blue signals) and the satellite DNAs pRN1 (with streptavidin-Cy5; red signals), BISat1 (with  
169 antidigoxigenin-FITC; green signals). The 18S rDNA is a widely used cytogenetic mark, usually flagging one  
170 chromosome pair in beets (Paesold et al. 2012; Rodríguez del Río et al. 2019). The chromosomes were  
171 counterstained with DAPI (grey). See Supplemental\_File\_S1 for signal counts and interpretation. The scale  
172 bars correspond to 5  $\mu$ m. Cytogenetically, hypothesis (II) is most supported, but evidence is not yet conclusive.

173 To explore the power of the wild beet genome data and assemblies for deducing and verifying the  
174 tetraploid parentage of *B. corolliflora*, we deployed five different computational approaches. Some of  
175 these approaches are based directly on Illumina reads as input data (read-based approaches) and  
176 are therefore not dependent on any assembly quality parameters.

177 The similarity of the genome sequences of two species reflects the distance of their relationship. In  
178 turn, the similarity of two sequences is reflected by the similarity of their *k*-mer sets. Essentially, the  
179 set of *k*-mers of a sequence equals a compact representation of that sequence. Additionally,  
180 comparing *k*-mer sets is assumed to be more robust than directly comparing sequences considering  
181 assembly errors, e.g. at repetitive regions. The horizontal bar plot (Figure 2A) summarises the  
182 composition of the *B. corolliflora* 21-mer set. *B. corolliflora* shares 27% of its *k*-mers exclusively with  
183 *B. macrorhiza* and 7% exclusively with *B. lomatogona*.

184 The overlap of the read-based *k*-mer sets of *B. corolliflora*, *B. lomatogona*, and *B. macrorhiza* was  
185 visualised in a Venn diagram (Figure 2B). The *k*-mer set of *B. macrorhiza* has a substantially higher  
186 intersection/overlap with the *B. corolliflora* *k*-mer set (3.5e8; 81% of the whole *B. macrorhiza* set)  
187 compared to the *B. lomatogona* *k*-mer set (1.9e8; 41% of the whole *B. lomatogona* set). Comparable  
188 results were observed using assembly datasets instead of read datasets as input to generate the *k*-  
189 mer sets.

**Running title: Pangenome of sugar beet and crop wild relatives**

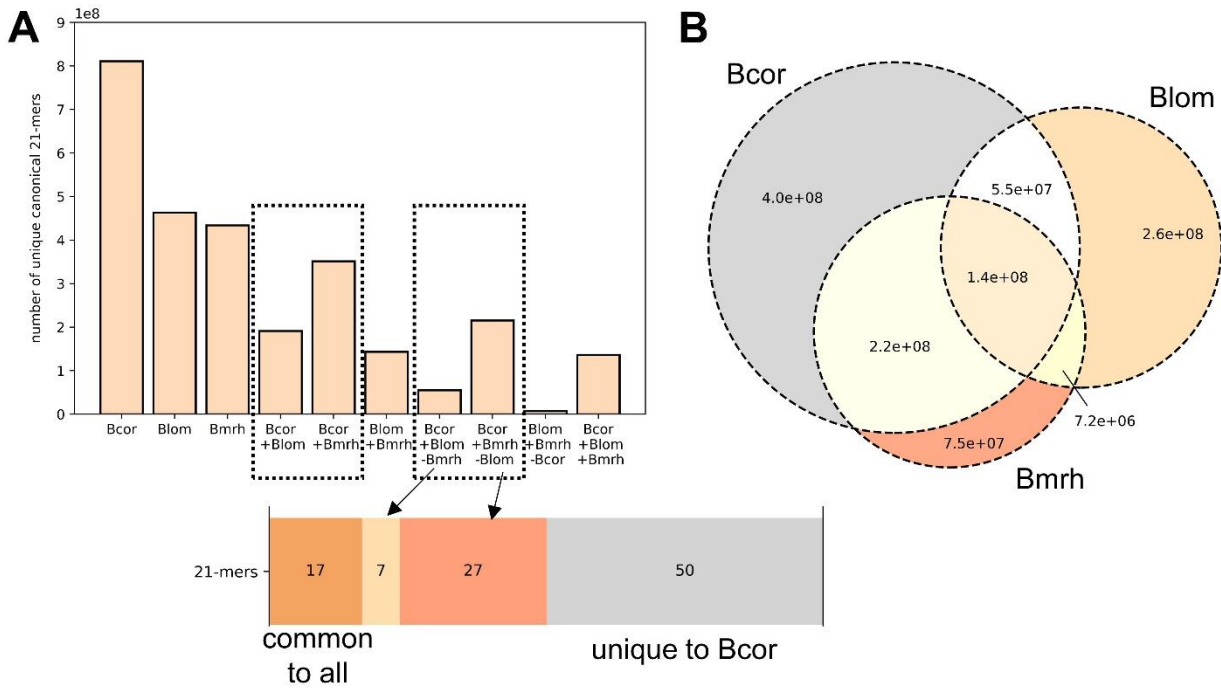

190

191 **Figure 2: Results of the *k*-mer set operations for each tested hypothesis.** A) Size (number of unique  
 192 canonical 21-mers) of all investigated sets. The bars within the left black box represent intersections between  
 193 the child species and each parent. The box on the right side represents the 21-mer set sizes including 21-mers  
 194 present in only one candidate parent species but not in the other. The horizontal bar plot below summarises the  
 195 composition of the *B. corolliflora* 21-mer set. B) Venn diagram for the read-based 21-mer sets of *B. corolliflora*,  
 196 *B. lomatogona*, and *B. macrorrhiza*.

197 In a second approach, generalised trio binning was performed. We adapted the classical trio binning  
 198 approach to resolve parental or more generally phylogenetic relationships by arguing that the number  
 199 of reads assigned to one of the parent candidates reflects its relationship to the child relative to the  
 200 other potential parent's relationship to the child species. For both, the assembly- and the read-based  
 201 trio, including *B. corolliflora*, *B. lomatogona*, and *B. macrorrhiza*, the percentage of reads assigned to  
 202 *B. macrorrhiza* (40% and 51.9%) is substantially higher than the percentage of reads assigned to *B.*  
 203 *lomatogona* (11.5% and 3.1%) (Table 2).

204 As a control trio for a well-known allopolyploid species complex, datasets of *Brassica oleracea* and  
 205 *Brassica rapa* as known parents of *Brassica napus* were analysed. A similar proportion of *B. napus*  
 206 reads was assigned to both parental species (0.291 and 0.245). Normalising the results for the  
 207 genome size differences (here, *B. napus* is considered both genomes combined (696+529)) results  
 208 in a proportion of reads, assigned to *B. oleracea* (contributes 56.8% to the *B. napus* genome) and *B.*  
 209 *rapa* (contributes 43.2% to the *B. napus* genome), of 0.512 and 0.567, respectively. The similar  
 210 amount of *B. napus* reads assigned to both parents shows that the method leads to the expected  
 211 results.



## Running title: Pangenome of sugar beet and crop wild relatives

212 As an ‘autopolyploid’ control, *B. vulgaris* subsp. *maritima* as known progenitor of *B. vulgaris* subsp.  
213 *vulgaris* was used together with *B. patula* which is not considered to be a progenitor of *B. vulgaris*  
214 subsp. *vulgaris*. These species are no polyploids, however, the progenitor-descendant relationship of  
215 these species is known, which enables further validation of our approach. For this trio, a clear signal  
216 towards *B. vulgaris* subsp. *maritima* is visible (35.6%) whereas 4.7% of the reads are assigned to *B.*  
217 *patula*.

218

219 **Table 2: Results of the generalised trio binning approach.** For each trio, the type of analysis, the type of  
220 input datasets used to generate the *k*-mer sets, the name of the child species as well as the proportion of reads  
221 assigned to each of the four classes are provided. Abbreviations: Bcor = *B. corolliflora*, Blom = *B. lomatogona*,  
222 Bmrh = *B. macrorhiza*, Bnap = *B. napus*, Bole = *B. oleracea*, Brap = *B. rapa*, Bvul = *B. vulgaris* subsp. *vulgaris*,  
223 Bpat = *B. patula*, Bmar = *B. vulgaris* subsp. *maritima*.

| Analysis       | Input      | Child species | Parent A    | Parent B    | Unclassified | Chimeric |
|----------------|------------|---------------|-------------|-------------|--------------|----------|
| Test case      | Reads      | Bcor          | Blom: 0.031 | Bmrh: 0.519 | 0.173        | 0.029    |
| Test case      | Assemblies | Bcor          | Blom: 0.115 | Bmrh: 0.4   | 0.257        | 0.05     |
| Control allo   | Reads      | Bnap          | Bole: 0.291 | Brap: 0.245 | 0.061        | 0.009    |
| Control ‘auto’ | Assemblies | Bvul          | Bpat: 0.047 | Bmar: 0.356 | 0.307        | 0.066    |

224

225 In a third *k*-mer based approach, *k*-mer fingerprints for numerous random sets were computed. As  
226 already described for the *k*-mer set operations approach, the more closely related two species are,  
227 the more similarity is expected between the respective *k*-mer sets.

228 The average absolute fingerprint sizes are shown in Table 3. *B. corolliflora* has the largest average  
229 fingerprint size (4,358). *B. patula*, *B. vulgaris* subsp. *maritima*, and *B. vulgaris* subsp. *vulgaris* show a  
230 similar average fingerprint size in the range of 3,061 to 3,088. *B. macrorhiza* shows the largest  
231 fingerprint intersection (3093; 92.7%), i.e. the overlap between the *B. macrorhiza* set with the set of  
232 the child species *B. corolliflora* (Table 3). This value is substantially higher than the one of the other  
233 putative diploid parent *B. lomatogona* (2822; 77.1%). Considering the diploids from the section *Beta*,  
234 *B. patula*, *B. vulgaris* subsp. *maritima*, and *B. vulgaris* subsp. *vulgaris* have similar fingerprint  
235 intersection sizes (2235-2251, 73.0%). The smallest fingerprint intersection size is observed for the  
236 wild beet representative from the sister genus *Patellifolia*, *P. procumbens* (2179; 66.4%).

237

**Running title: Pangenome of sugar beet and crop wild relatives**

238 **Table 3: Results of the *k*-mer fingerprinting approach.** 2<sup>nd</sup> column: Average fingerprint sizes of all random  
 239 sets of size 10,000 for all investigated species. 3<sup>rd</sup> and 4<sup>th</sup> column: Absolute and relative (relative with respect  
 240 to the parent candidate) average fingerprint intersection sizes of all parent candidates. In addition to the average  
 241 values, the standard deviations are shown.

| Species                                   | Average fingerprint size | Absolute average fingerprint intersection size with <i>B. corolliflora</i> | Relative average fingerprint intersection size with <i>B. corolliflora</i> [%] |
|-------------------------------------------|--------------------------|----------------------------------------------------------------------------|--------------------------------------------------------------------------------|
| <i>B. corolliflora</i>                    | 4358 ± 50                | -                                                                          | -                                                                              |
| <i>B. lomatogona</i>                      | 3658 ± 48                | 2822 ± 45                                                                  | 77.1                                                                           |
| <i>B. macrorhiza</i>                      | 3335 ± 47                | 3093 ± 46                                                                  | 92.7                                                                           |
| <i>B. patula</i>                          | 3076 ± 46                | 2245 ± 42                                                                  | 73.0                                                                           |
| <i>B. vulgaris</i> subsp. <i>maritima</i> | 3088 ± 46                | 2251 ± 42                                                                  | 73.0                                                                           |
| <i>B. vulgaris</i> subsp. <i>vulgaris</i> | 3061 ± 46                | 2235 ± 42                                                                  | 73.0                                                                           |
| <i>P. procumbens</i>                      | 3284 ± 47                | 2179 ± 41                                                                  | 66.4                                                                           |

242

243 The fourth applied approach relied on cross-species mapping of synthetic reads. It is expected that  
 244 the closer two species are related, the higher their sequence similarity. Therefore, it is expected to  
 245 find more regions of an assembly of one species in an assembly of the other species, the closer these  
 246 species are related. Based on these assumptions, a mapping approach was developed to present  
 247 evidence for the parental relationships of tetraploid *B. corolliflora*. This mapping approach to resolve  
 248 the parental relationships of *B. corolliflora* directly compares the two candidate parental species.  
 249 Supplemental\_File\_S2 shows the percentage of synthetic *B. corolliflora* reads that mapped  
 250 exclusively to *B. lomatogona*, exclusively to *B. macrorhiza* or to both species with a sequence identity  
 251 of at least 60%. For all considered synthetic read lengths (5 kb, 10 kb, and 20 kb), the percentage of  
 252 reads that map to both potential parents is below 1%. With shorter read length, the percentage of  
 253 reads mapping only to *B. macrorhiza* increases whereas the percentage of reads mapping only to *B.*  
 254 *lomatogona* decreases. For 5 kb reads, more than twice as many successfully mapped reads map  
 255 exclusively to Bmrh v1.0 (68% versus 31% for BlomONT v1.0). When mapping 5 kb reads against  
 256 the reference consisting of *B. lomatogona* shredded into 5 kb chunks and the short read assembly of  
 257 *B. macrorhiza*, the results are almost identical to the ones using the full-length *B. lomatogona*  
 258 assembly as reference.

## Running title: Pangenome of sugar beet and crop wild relatives

259 In a fifth approach, that is based on gene sequences, the similarity of orthologous genes was used  
260 as a measure to assess the putative parents of tetraploid *B. corolliflora*. A large basis of single  
261 nucleotide variants (SNVs) in single-copy BUSCO genes was employed to calculate phylogenetic  
262 distances of the gene sequences of the potential parents to the respective gene sequence of *B.*  
263 *corolliflora*. For this, 140 single BUSCO gene phylogenies were computed. The phylogenetic distance  
264 of the *B. macrorhiza* genes to the respective closest related *B. corolliflora* gene (mean approx. 0.0213)  
265 is significantly smaller when compared to *B. lomatogona* (mean approx. 0.0305) (U-test;  $p \approx 5e-24$ )  
266 (Figure 3A). This means that *B. macrorhiza* genes are substantially more often found in a common  
267 phylogenetic unit together with the respective *B. corolliflora* gene, whereas *B. lomatogona* genes are  
268 often found on a separate branch in the phylogenetic tree (Figure 3B, 3C).

269 To gain more insight, phylogenetic distances in trees in which the *B. macrorhiza* gene is not clustered  
270 with the closest *B. corolliflora* gene were further investigated. Branch lengths in such trees are  
271 particularly small and *B. corolliflora*, *B. lomatogona*, and *B. macrorhiza* sequences of the respective  
272 genes are hardly distinguishable with phylogenetic distances of e.g.,  $< 0.0086$  (average distance  
273 between two sequences in this tree: 0.104197).

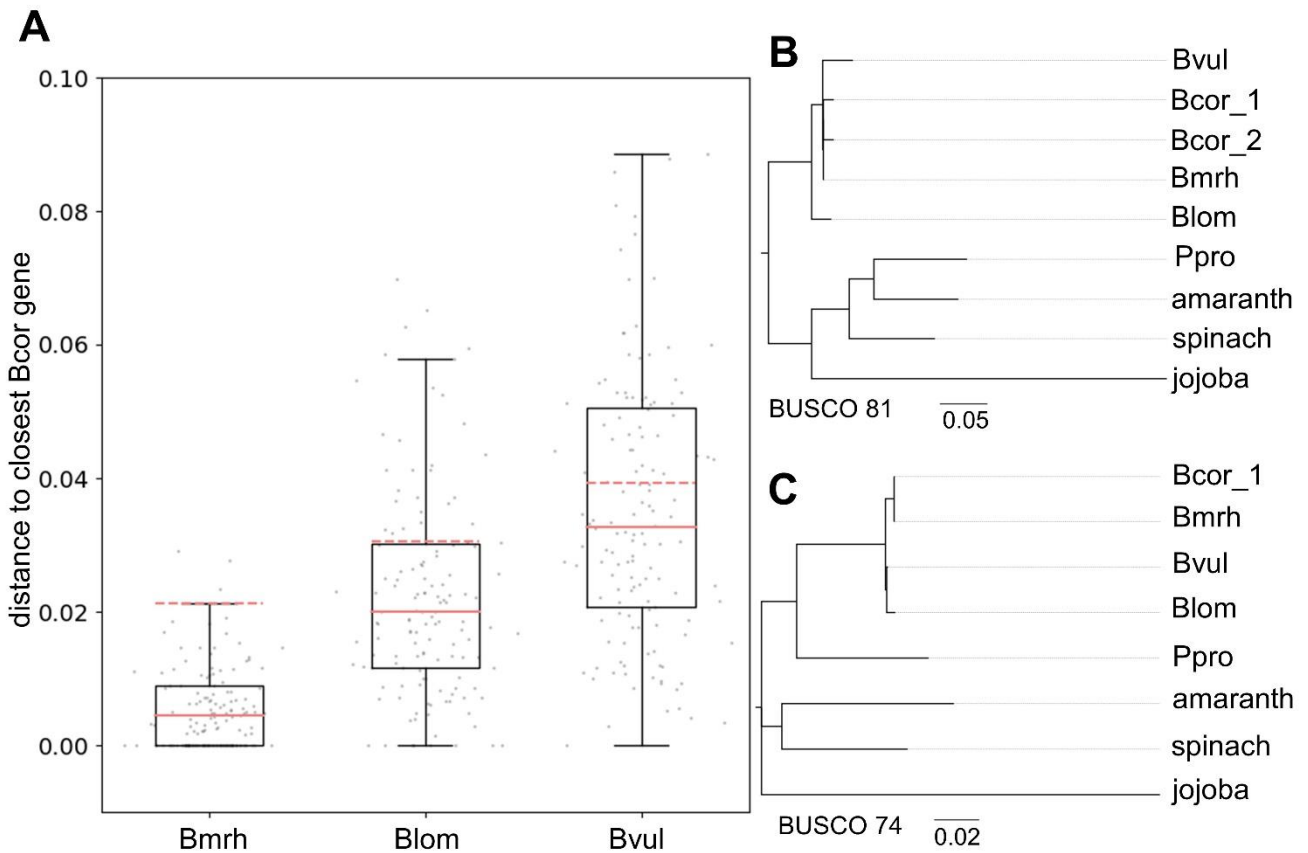

## Running title: Pangenome of sugar beet and crop wild relatives

275 **Figure 3: Results of the gene-based approach to determine the parental relationships of *B. corolliflora*.**  
276 A) Phylogenetic distance of all 'parental' genes to the respective closest related *B. corolliflora* gene. The mean  
277 is shown as a dashed orange line whereas the median is represented by a solid orange line. B, C) Phylogenetic  
278 ML trees for two selected BUSCO genes. Bcor\_1 and Bcor\_2 represent two different copies of the same gene  
279 in *B. corolliflora* (duplicated BUSCO). Spinach (*S. oleracea*), amaranth (*A. hypochondriacus*), and jojoba (*S.*  
280 *chinensis*) were used as outgroup species. Abbreviations: Bcor = *B. corolliflora*, Blom = *B. lomatogona*, Bmrh =  
281 *B. macrorhiza*, Bvul = *B. vulgaris* subsp. *vulgaris*, Ppro = *P. procumbens*.

282

### 283 'Lost' regions in sugar beet but present in the wild beets

284 As especially polyploid CWRs might harbour properties/traits not present in the cultivated beet, the  
285 newly generated pangenome resources, including tetraploid *B. corolliflora*, were used to identify  
286 regions not present in the KWS2320 sugar beet breeding material. These regions might harbour  
287 information for traits relevant for breeding which are not present in the cultivated beet. Based on  
288 overlapping genes associated with specific traits, these regions are possibly interesting for future  
289 breeding endeavours. For the investigated CWRs, 4.0% to 10.2% of the genome sequence  
290 assemblies were found to be 'zero coverage regions' and therefore to be 'lost' and/or not present in  
291 sugar beet KWS2320 (Supplemental\_File\_S3). In these regions of the CWRs, several genes related  
292 to plant defence, to pathogens, to response to various stimuli or to other possibly interesting traits  
293 were identified.

294

### 295 Discussion

296 To investigate the pangenome of sugar beet and its CWRs, the first genome sequence assemblies  
297 for four different wild beets (*B. corolliflora* (2n=4x), *B. lomatogona* (2n=2x), *B. macrorhiza* (2n=2x),  
298 and *P. procumbens* (2n=2x)) were generated. Published genome sequences of *B. patula* and *B.*  
299 *vulgaris* subsp. *maritima* (Rodríguez del Río et al. 2019) as well as the reference genome sequence  
300 of cultivated sugar beet (KWS2320ONT v1.0) (Sielemann et al. 2023), were integrated to i) get  
301 evidence for the parental relationships of the tetraploid beet *B. corolliflora* and ii) analyse genomic  
302 regions in CWRs associated with traits of interest.

### 303 *B. macrorhiza* as single parent of autotetraploid *B. corolliflora*

304 We combined multi-colour cytogenetics with five computational approaches to elucidate the type of  
305 tetraploidy in *B. corolliflora* and its ancestry. Using all six approaches, we can now confidently exclude  
306 *B. lomatogona* as parental species, and we find comprehensive evidence of an emergence as

## Running title: Pangenome of sugar beet and crop wild relatives

307 autotetraploid from *B. macrorhiza*. Alternatively, as an option that we cannot distinguish from the  
308 autotetraploid scenario, *B. corolliflora* might be an allotetraploid derived from two different but closely  
309 related *B. macrorhiza* genotypes.

310 To define the diploid ancestry of a polyploid is a question that is and has been commonly addressed  
311 using cytogenetics (Schmidt et al. 2019; Heitkam et al. 2020; Desel 2002). Here, as the parental  
312 genomes are closely related with relatively limited variation amongst cytogenetic probes, the question  
313 is answered only with difficulty and not conclusively. Still, our cytogenetic analysis retained most  
314 support for *B. corolliflora*'s autotetraploidy emerging from *B. macrorhiza*.

315 To convincingly resolve the question of *B. corolliflora*'s tetraploidy, we leveraged five data-driven  
316 genomics approaches using our wild beet pangenome dataset. Three approaches are based on *k*-  
317 mers, one is based on mapping of synthetic reads and a fifth approach is based on sequences of  
318 conserved and orthologous genes. The advantage of the *k*-mer approaches using reads as input to  
319 generate the species-specific sets is that these approaches do not rely on a reference genome  
320 sequence and are not dependent on e.g. the identification of homology through computationally  
321 expensive (whole genome) alignment approaches (Ondov et al. 2016; VanWalleendael and Alvarez  
322 2022).

323 For all *k*-mer based approaches, it is important to take the genome size of the potential parents into  
324 account. The *k*-mer set size is dependent on the genome size and also on the size of the assembly,  
325 since the probability of a *k*-mer occurring just by chance grows with increasing genome sequence  
326 size. *B. corolliflora* has an assembly size of 1,963 Mb and a 21-mer set size of  $6.7e8$ , whereas *B.*  
327 *lomatogona* and *B. macrorhiza* have an assembly size of 1,032 Mb and 736 Mb and a corresponding  
328 21-mer set size of  $4.9e8$  and  $4.3e8$ , respectively (see Table 1). For polyploids, the haploid genome  
329 size might be more relevant. An additional copy of a genome, e.g. diploid vs. autotetraploid, does not  
330 increase the *k*-mer set size linearly. However, rearrangements, TE expansions, and particularly small  
331 mutations occurring after the polyploidisation/hybridisation increase the potential for additional *k*-  
332 mers. In addition to the biological genome size, the completeness and therefore the quality of the  
333 assembly has similar effects on the *k*-mer set size. Even though the assembly quality for *B.*  
334 *macrorhiza* is lower compared to the quality of the long read assemblies, there is a striking signal  
335 towards *B. macrorhiza* for all approaches.

336 The composition of the *B. corolliflora* 21-mer set (Figure 2A) shows a higher overlap with the *B.*  
337 *macrorhiza* set than with the *B. lomatogona* set, indicating a closer relationship of *B. corolliflora* and  
338 *B. macrorhiza*. A higher *k*-mer set similarity implies a higher sequence similarity and therefore closer  
339 phylogenetic relationship. As visualised in the Venn diagram (Figure 2B), both the absolute and the  
340 relative intersection sizes of *B. corolliflora* and *B. macrorhiza* are greater than those of *B. corolliflora*

## Running title: Pangenome of sugar beet and crop wild relatives

341 and *B. lomatogona*, i.e. the 21-mer sets of *B. corolliflora* and *B. macrorhiza* are more similar. The  
342 Venn diagrams of the 21-mer sets of *B. corolliflora*, *B. lomatogona*, and *B. macrorhiza* based on  
343 assemblies and reads, respectively, are comparable. Especially considering the fragmented  
344 assembly of *B. macrorhiza*, this supports the robustness of the *k*-mer set operations.

345 For trio binning, if both investigated species were the actual parental species of the child, it was  
346 expected that approximately the same number of reads would be assigned to both supposed parents.  
347 If only one of the candidate species was the parent, substantially more reads should be assigned to  
348 the designated species. This number depends on the phylogenetic relationship of the second  
349 candidate to the child species. Multiple factors, however, may lead to a divergence from these  
350 expectations: unequal genome sizes of both parents lead to a higher expected number of reads  
351 assigned to the species with the larger genome. Bias during the process of sequencing may also lead  
352 to an uneven distribution of reads (Ross et al. 2013). Rearrangements and sequence differences  
353 originating during the species' evolution, especially of the genome of the child species may distort  
354 read distribution and *k*-mer content. Since rearrangements and extended genome divergence are  
355 regularly observed in polyploid species (Van de Peer et al. 2017), the trio binning approach is mainly  
356 aimed at resolving the parental relationships of young hybrid species.

357 Two 'control trios' were selected to validate the generalised trio binning approach. As allotetraploid  
358 control, the *B. napus*, *B. oleracea*, and *B. rapa* trio was used (Lu et al. 2019). A similar number of  
359 reads was assigned to both known parents of *B. napus*. The number is slightly higher for *B. oleracea*,  
360 which can be explained by the larger 21-mer set size ( $2.3e8$  for *B. oleracea* vs.  $1.6e8$  for *B. rapa*).  
361 Overall, the results show that the method leads to the expected results. The second control trio  
362 comprises the sea beet as known progenitor of sugar beet (Biancardi and Lewellen 2020; Wascher  
363 et al. 2022) as well as *B. patula*, not a progenitor of sugar beet. More than seven times more reads  
364 are assigned to the sea beet compared to *B. patula*, which confirms the close relation of sea beet and  
365 sugar beet.

366 Regardless of using assemblies or reads as input for a trio of interest, substantially more reads are  
367 assigned to *B. macrorhiza*. Again, an advantage of this approach is that it does not rely on assembled  
368 data, even though it is possible to use assembled data as input. Using assemblies as input, *B.*  
369 *macrorhiza* obtains about four times more reads, whereas using reads as input, about 17 times more  
370 reads are assigned to *B. macrorhiza* than to *B. lomatogona*. These results indicate that *B. macrorhiza*  
371 might be the single parent of autoploid *B. corolliflora*. The difference in the results when using  
372 assemblies versus reads as input can be explained by the *k*-mer set sizes derived from the assemblies  
373 of *B. lomatogona* ( $3.5e8$ ) and *B. macrorhiza* ( $2.8e8$ ). The assembly-based *k*-mer set for *B. macrorhiza*  
374 is smaller, which can be explained by the fragmented short read assembly in which *k*-mers exclusive  
375 to unassembled regions might be missing. Using reads as input, it can be assumed that the

## Running title: Pangenome of sugar beet and crop wild relatives

376 normalised read datasets reflect the true  $k$ -mer sets well. Indeed, the difference in the size of the  
377 exclusive  $k$ -mer sets when using reads is smaller ( $3.2e8$  for *B. lomatogona* and  $2.9e8$  for *B.*  
378 *macrorhiza*).

379 The idea of the  $k$ -mer fingerprinting approach is similar to the  $k$ -mer set operations method, however,  
380 there are two major differences: i) the randomisation introduced in the fingerprinting method can  
381 reduce the impact of errors when taking the average over a sufficiently large number of random sets  
382 and ii) this approach allows to compare more than two parent candidates simultaneously. The average  
383 fingerprint sizes are mainly related to genome size and sequence diversity (Table 3). *B. corolliflora*  
384 shows the largest average fingerprint size since the genome sequence is the largest among the  
385 investigated organisms. Considering the relative fingerprint intersection sizes, the results reflect the  
386 phylogenetic relationships of the species (Sielemann et al. 2022). *P. procumbens* has the highest  
387 phylogenetic distance to *B. corolliflora* among the investigated organisms and shows the smallest  
388 relative fingerprint intersection size. The fingerprint intersection sizes of all other investigated species  
389 also directly reflect the phylogenetic distances. The substantial difference in average relative  
390 fingerprint intersection size between *B. lomatogona* (77.1%) and *B. macrorhiza* (92.7%) suggests that  
391 *B. macrorhiza* is more closely related to *B. corolliflora* and presumably the single parent species. For  
392 the  $k$ -mer fingerprinting approach, an additional comparison with *B. nana* and *B. intermedia*, two  
393 additional species of the section *Corollinae*, would have been interesting, however, not enough data  
394 was available.

395 The synthetic read mapping approach reflects the similarity between sequence sections (synthetic  
396 reads) of *B. corolliflora* and the assembly sequences of the potential parent species. An advantage  
397 of this approach is the equal coverage distribution of the child species' synthetic reads close to one.  
398 Therefore, specific regions are not substantially over- or underrepresented and the results are not  
399 biased by such sequences. Further, such synthetic, contig-based reads likely contain fewer errors  
400 than the actual sequencing reads the contigs are based on. The decrease in the percentage of reads  
401 which exclusively map to *B. macrorhiza* with increasing synthetic read length  
402 (Supplemental\_File\_S2), can be explained by the high fragmentation of the *B. macrorhiza* assembly.  
403 For synthetic reads of 5 kb length, more than twice as many reads map exclusively to *B. macrorhiza*  
404 compared to *B. lomatogona*. This indicates a higher sequence similarity and thus also a closer  
405 relationship between *B. macrorhiza* and *B. corolliflora* as opposed to *B. lomatogona* and *B. corolliflora*.

406 The gene-based approach was developed to assess the sequence similarity of conserved BUSCO  
407 genes (Simão, Felipe A and Waterhouse, Robert M and Ioannidis, Panagiotis and Kriventseva,  
408 Evgenia V and Zdobnov, Evgeny M 2015) between child and potential parent species. These  
409 investigated sequences are more similar between *B. macrorhiza* and *B. corolliflora* as shown by the  
410 clusters in the phylogenetic tree separate from the respective *B. lomatogona* gene sequence.

## Running title: Pangenome of sugar beet and crop wild relatives

411 Combining all our results, cytogenetics and the five computational approaches, a clear pattern  
412 towards resolving *B. corolliflora*'s ancestry emerges (Table 4).

413 **Table 4: Overview of the results of each of the five newly developed methods to get evidence for the**  
414 **parental relationships of *B. corolliflora*.** A plus (+) indicates that the method yields a signal for the  
415 corresponding species, while a hyphen (-) means that the respective species is not likely to be in a parental  
416 relationship with the tetraploid wild beet *B. corolliflora*.

| Approach                 | Signal for <i>B. lomatogona</i> | Signal for <i>B. macrorhiza</i> |
|--------------------------|---------------------------------|---------------------------------|
| Comparative cytogenetics | -                               | +                               |
| K-mer set operations     | -                               | +                               |
| Trio binning             | -                               | +                               |
| K-mer fingerprinting     | -                               | +                               |
| Synthetic read mapping   | -                               | +                               |
| Gene trees               | -                               | +                               |

417

418 All approaches show a clear signal towards *B. macrorhiza* being the single parent species of *B.*  
419 *corolliflora*, which therefore would be most likely an autotetraploid species. However, we cannot  
420 exclude the possibility that the real parental species of *B. corolliflora* is an unknown and possibly  
421 already extinct species very closely related to *B. macrorhiza*, or that *B. corolliflora* originated from a  
422 hybridisation event of such an unknown species with *B. macrorhiza* (Figure 4). Further, allo- and  
423 autopolyploidy are considered to reside along a 'spectrum' (Mason and Wendel 2020): i) highly  
424 diverse subgenomes from a single species can lead to the formation of a more polymorphic  
425 autopolyploid as compared to an allopolyploid species derived from two less diverged species. ii)  
426 Homoeologous exchanges can contribute to the formation of a partially autopolyploid species from  
427 an initial allopolyploid. This means that different regions of the genome appear to be allopolyploid  
428 whereas other regions appear to be autopolyploid. iii) Directional selection of genes, which favours  
429 one of the parental genomes, may cause homoeologs to 'appear' autopolyploid (Mason and Wendel  
430 2020) even though the species is an allopolyploid of origin. Recreation of polyploids by crossing of  
431 the parental species may resolve if some of these mechanisms occur after the polyploidisation event.



**Running title: Pangenome of sugar beet and crop wild relatives**

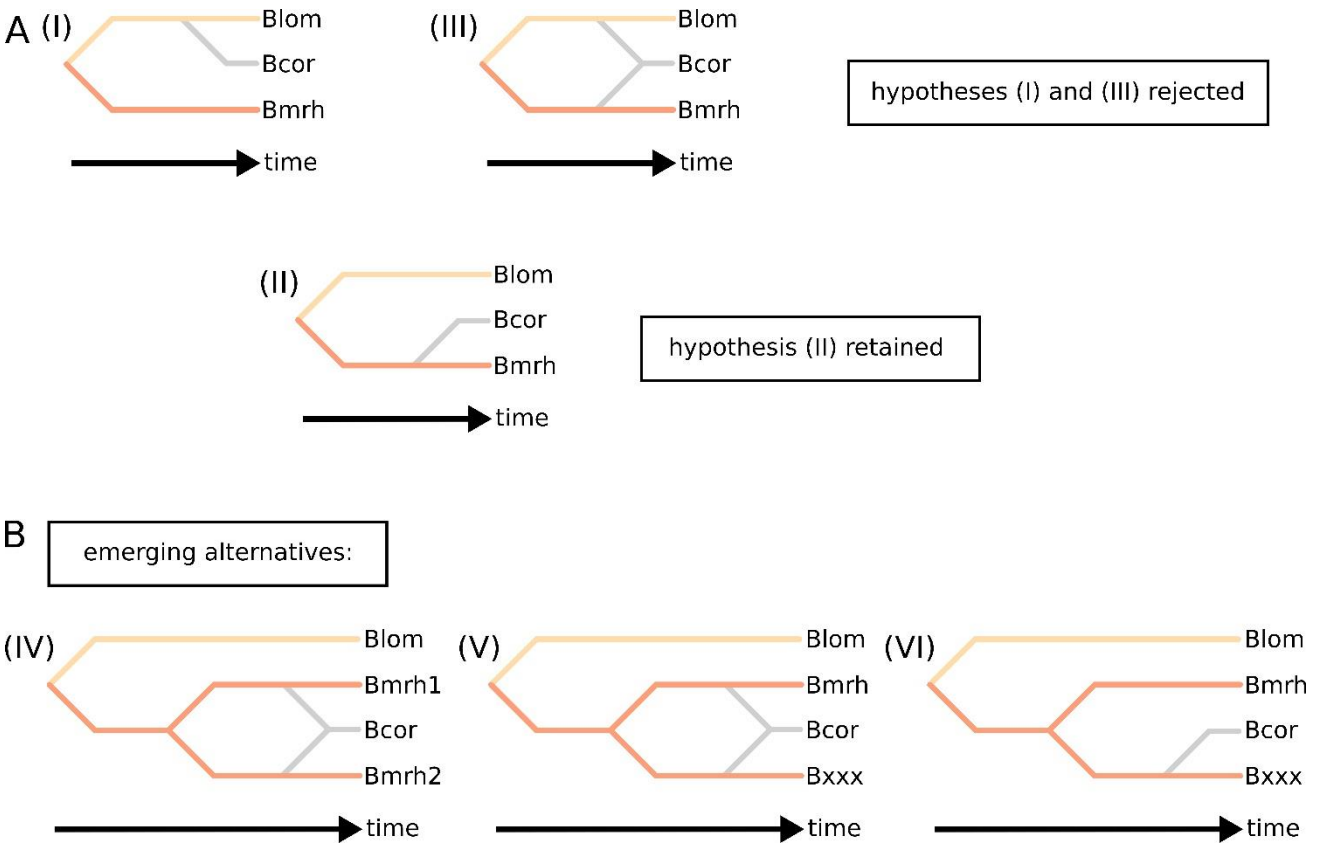

432

433 **Figure 4: Amended hypotheses regarding the origin of tetraploid *B. corolliflora*.** From the initial three  
 434 **hypothesis (A I-III), two hypotheses were disproved (I and III).** *B. corolliflora* (Bcor) might be an  
 435 autotetraploid species with Bmrh as a single parent (hypothesis II). This possibility is sharpened by the  
 436 emergence of three new hypotheses (B IV-VI), in which *B. corolliflora* either originated from the hybridisation of  
 437 two different *B. macrorhiza* cytotypes (IV), of *B. macrorhiza* with an unknown, possibly extinct *Beta* species  
 438 (Bxxx) closely related to *B. macrorhiza*, or from the autopolyploidisation from this unknown *Beta* species (VI).  
 439 However, these hypotheses cannot be tested with the available data as the existence of Bxxx is unknown.

440

441 **Harnessing CWRs to identify traits relevant for crop improvement**

442 The pangenome dataset was used to identify CWR regions that are not present in cultivated sugar  
 443 beet represented by KWS2320. 'Lost' regions in the cultivated sugar beet KWS2320, but present in  
 444 the wild beet species, were defined as follows. If the region is not present in sugar beet, (almost) no  
 445 reads of sugar beet should map to the corresponding region in any of the crop wild relatives. Based  
 446 on this rationale, 'zero coverage regions' were extracted. Genes overlapping with 'zero coverage  
 447 regions' were extracted since these regions might be relevant for future breeding endeavours.  
 448 Potentially beneficial biotic and abiotic traits among the 'lost' genes were identified. In the following,  
 449 the detected traits are discussed in terms of their relevance for sugar beet breeding.

## Running title: Pangenome of sugar beet and crop wild relatives

450 Through a functional annotation that was generated for BcorONT v1.0, BlomONT v1.0, Bmrh v1.0,  
451 and PproONT v1.0 (10.4119/unibi/2966932), the set of identified CWR genes was investigated for  
452 specific disease resistance genes, genes conferring tolerances, and genes related with response to  
453 bacteria, viruses, or fungi. Most genes identified in the zero coverage regions have no functional  
454 annotation, however, 39 different disease resistance proteins and putative disease resistance  
455 proteins were collectively identified for all four species in the functional annotations. Only 16 of them  
456 were present in the annotation of at least two species, the remaining 23 were unique to one of them.  
457 The annotation for *B. corolliflora* contained all of the five (putative) R-genes *RGA1-5*, *B. lomatogona*  
458 and *B. macrorhiza* *RGA1-4*, and *P. procumbens* *RGA3*. A *RGA2* homolog confers resistance to the  
459 oomycete *Phytophthora infestans* in wild potato (Song et al. 2003; van der Vossen et al. 2003).  
460 Additionally, multiple putative disease resistance proteins with no further known function were found.  
461 For *B. corolliflora* and *B. lomatogona*, the gene *RPP8* was found, which confers resistance to  
462 *Prenospora paraistica*, which is an oomycete (Berardini et al. 2015; Cooley et al. 2000; Zhu et al.  
463 2011, 101). Multiple genes related to *A. thaliana* R-genes were found, one of which  
464 (*At3g14460/LRRAC1*, found in *B. corolliflora* and *B. macrorhiza*) is associated with defence response  
465 to fungal pathogens (Bianchet et al. 2019; Bairoch and Boeckmann 1991). *B. corolliflora* contained  
466 most unique resistance genes (22) compared to the other investigated species, followed by *B.*  
467 *macrorhiza* (20). Genes that are unique to *B. corolliflora* were e.g. *RPM1*, *At5g66890*, *At5g43730*,  
468 and the putative late blight resistance protein homolog *R1B-19* (*Solanum demissum*). *RPM1* confers  
469 resistance to some *Pseudomonas syringae* strains (Berardini et al. 2015; Yoon et al. 2022).

470 The *A. thaliana* orthologs (RBHs) were used for the transfer of functional information, especially for  
471 the two species (*B. patula* and *B. vulgaris* subsp. *maritima*) for which no other functional annotation  
472 was available. Several genes play a role in thermotolerance (e.g. response to heat/cold) and in  
473 response to various bacterial, viral and fungal pathogens. Further, genes associated with stress  
474 response to salt and drought, as well as genes associated with the regulation of flowering time, were  
475 identified. Genes relevant in response to herbivores include *KTI1* (*B. patula*) and *KTI5* (*B.*  
476 *macrorhiza*), which are involved in the defence response to spider mites (*Tetranychus urticae*) (Arnaiz  
477 et al. 2018). Spider mites infect a wide range of hosts, one of them being sugar beet (Reynolds et al.  
478 1967). It has been shown that spider mites have a high amount of pesticide resistances, which is why  
479 a plants' natural defence against them is beneficial (Arnaiz et al. 2018). Additionally, genes involved  
480 in the defence or response to some fungi, viruses (e.g. geminiviruses (Chung and Sunter 2014)),  
481 bacteria, as well as the nematode *Heterodera schachtii* (Shah et al. 2017) were identified. In the  
482 context of abiotic stresses, multiple genes relevant to drought resistance and tolerance of water  
483 deprivation were found (e.g. *B. macrorhiza*, *B. vulgaris* subsp. *maritima*). Due to climate change,  
484 drought displays a major limiting factor when it comes to sugar beet breeding (Ober and Rajabi 2010).  
485 Drought already causes about 10% of yield loss in parts of Europe and is believed to aggravate even

## Running title: Pangenome of sugar beet and crop wild relatives

486 further (Ober and Rajabi 2010). Another important abiotic factor is temperature. Genes related to heat  
487 acclimation (e.g. *B. corolliflora*), as well as cold response (e.g. *B. macrorhiza*) were identified. Sugar  
488 beets are predominantly cultivated in the temperate zone and grow most effectively in temperature  
489 ranges between 17 °C and 25 °C (Ober and Rajabi 2010). However, hotter and colder climates  
490 present potential new cultivation areas for adapted sugar beets. For example, freezing temperatures  
491 are harmful for sugar beet seedlings, which is why prior breeding initiatives already bred for cold  
492 resistant variants (Burenin et al. 1994). The findings suggest that wild beets might have a relevant  
493 potential to improve the adaptation of sugar beet to extreme climate conditions.

494 In terms of pathogen resistances, various examples of different categories could be identified. *B.*  
495 *vulgaris* subsp. *maritima* further contained a homolog (*At4g13350/NIG*) that negatively affects the  
496 tolerance against geminiviruses, a broad group of plant viruses. One of the viruses contained in that  
497 group is the beet curly top virus, which infects sugar beet (Yazdi et al. 2008). It causes curly top  
498 disease, which results in leaf curling, phloem necrosis and other symptoms (Yazdi et al. 2008). An  
499 important pathogen that has already been relevant in prior breeding initiatives is the cyst nematode  
500 *Heterodera schachtii*. A nematode resistance has been successfully transferred from *P. procumbens*  
501 to sugar beet in the past (Cai et al. 1997). In *P. procumbens* and *B. macrorhiza*, a gene  
502 (*At2g01340/At17.1*) which is associated with response to nematode infection, was identified. For *B.*  
503 *lomatogona*, *AT5G06860/PGIP1* was identified and this homolog attenuates infection with *Heterodera*  
504 *schachtii* (Shah et al. 2017). The gene *At2g01340/At17.1* is significantly induced in response to  
505 *Sclerotinia sclerotiorum* (pathogenic fungus), *Botrytis cinerea*, *Pseudomonas syringae* pv. *tomato*  
506 DC3000 *AvrRPS4*, *Verticillium dahliae*, and *Colletotrichum tofieldiae* (Didelon et al. 2020). A gene  
507 (*At2g43710/SSI2*) that is related to the response to the green peach aphid has been identified in *B.*  
508 *macrorhiza* (Berardini et al. 2015; Li et al. 2021). This insect has been shown to be an important  
509 transmitter of the previously mentioned curly top virus in sugar beet (Sylvester 1956). Mutation of this  
510 gene in *A. thaliana* causes hyper-resistance (Berardini et al. 2015; Li et al. 2021).

511 In summary, the presented method led to the identification of various regions and genes of interest.  
512 Even though the model organism *A. thaliana*, instead of sugar beet itself, had to be used to extract  
513 possible functions, the results show that the genetic variation present in beet wild relatives provides  
514 high potential to expand the sugar beet's gene pool.

515 In a second approach, we identified regions derived from *B. vulgaris* subsp. *maritima* - the progenitor  
516 of sugar beet (Biancardi and Lewellen 2020) - and show evidence to support the assumption of sea  
517 beet being the progenitor of cultivated sugar beet (Supplemental\_File\_S4). Despite the usage of  
518 relatively strict thresholds to ensure the identification of high-confidence regions derived from sea  
519 beet, more than 101 Mb of highly conserved regions, representing 17.6% of the whole genome  
520 sequence, were identified in sugar beet. Conserved genes within these regions, possibly derived from

## Running title: Pangenome of sugar beet and crop wild relatives

521 sea beet, are e.g. associated with response to salt stress (more than 50 genes). Cultivated beets  
522 show higher salt tolerance compared to other crops, especially during germination and seed  
523 development (Pinheiro et al. 2018; Skorupa et al. 2019). The ability to tolerate high salt concentrations  
524 is a great advantage for wild sea beets since they are almost exclusively found in coastal regions  
525 (Romeiras et al. 2016). In such environments, salt stress represents the most significant abiotic stress.  
526 The results of our analysis and the mentioned studies suggest that many of the identified salt stress-  
527 related genes have originated in the sea beet.

## 528 Conclusion

529 In this study, the pangenome dataset of sugar beet and CWRs was harnessed to get evidence for the  
530 parental relationships of a polyploid species and to identify traits relevant for crop improvement.

531 The developed methods to resolve polyploid relationships are based on different concepts and lead  
532 to unambiguous results concerning the three tested hypotheses. Therefore, *B. lomatogona* can be  
533 excluded as parent species of *B. corolliflora*. Further, it can be concluded that *B. macrorhiza* might be  
534 the single parent of the autotetraploid wild beet *B. corolliflora*. The newly developed approaches used  
535 to solve this question can also be applied to other datasets. The generalised trio binning approach  
536 seems promising to resolve parental relationships and in general phylogenetic relations of closely  
537 related species. Extending the generalised trio binning approach to not only consider unique *k*-mers  
538 but also *k*-mer frequencies is another interesting option. Further, all *k*-mer based methods could be  
539 used with skip-mers instead, a concept to include information from more distant genomic positions  
540 and to decrease the impact of SNVs (Clavijo et al. 2017).

541 The investigation of genomic regions not (anymore/yet) present in the cultivated sugar beet genome  
542 revealed several genes associated with pathogen resistance and tolerance to abiotic stresses. These  
543 genes are candidates for breeding endeavours to obtain sustainable crops.

544 Summarizing, we show the potential of the newly generated genome resources of CWRs of sugar  
545 beet which are an essential building block for future investigations and crop improvement.

546

## 547 Methods

### 548 Plant material

549 The Leibniz Institute of Plant Genetics and Crop Plant Research Gatersleben (IPK), Germany,  
550 provided seeds for *B. corolliflora* (BETA 408), *B. lomatogona* (BETA 674), *B. macrorhiza* (BETA 830),  
551 and *P. procumbens* (BETA 419). The material was transferred under the regulations of the standard

## Running title: Pangenome of sugar beet and crop wild relatives

552 material transfer agreement (SMTA) of the International Treaty. All plants were grown under standard  
553 greenhouse conditions.

### 554 DNA extraction, sequencing and *de novo* assembly

555 For *B. macrorhiza*, a short read Illumina assembly was generated, as only a low amount of plant  
556 material was available, which was not sufficient for preparing DNA suitable for long read sequencing.  
557 High molecular weight DNA was extracted using a previously described CTAB-based method (Siadjeu  
558 et al. 2020). DNA extraction as well as Illumina sequencing was performed as previously described  
559 (Sielemann et al. 2022). In total, 138 GB read data were generated (Supplemental\_File\_S5). The  
560 reads were trimmed using Trimmomatic (v0.39) (Bolger et al. 2014) as described (Sielemann et al.  
561 2022) and the quality was assessed using fastqc (v0.11.9) (Andrews 2020). All trimmed reads were  
562 subjected to DiscovarDeNovo (v52488) (run with default parameters and 10 threads;  
563 <https://www.broadinstitute.org/software/discovar/blog>) (Love et al. 2016) for *de novo* genome  
564 assembly after converting the fastq files to unmapped BAM files with picard tools (v2.5.0)  
565 (<http://broadinstitute.github.io/picard/>). Contigs with a length below 500 bp were discarded. BUSCO  
566 (v5.2.2) (Simão, Felipe A and Waterhouse, Robert M and Ioannidis, Panagiotis and Kriventseva,  
567 Evgenia V and Zdobnov, Evgeny M 2015) (embryophyta\_odb10 dataset) was used with default  
568 parameters and 10 threads to assess the completeness of the assembly. Sequences with matches  
569 to a 'black list' were discarded as previously described (Siadjeu et al. 2020) to obtain the final genome  
570 assembly sequence (Supplemental\_File\_S6).

571 High-continuity long read assemblies were generated for *B. corolliflora*, *B. lomatogona*, and *P.*  
572 *procumbens*. Genomic DNA was extracted using a CTAB-based method (Siadjeu et al. 2020). Quality  
573 control was performed by agarose gel electrophoresis, NanoDrop measurement and Qubit analysis  
574 (Siadjeu et al. 2020). The short read eliminator kit (Circulomics) was used prior to library preparation  
575 following the SQK-LSK109 protocol. Sequencing was performed on a GridION using R9.4.1 flow cells  
576 as described previously (Siadjeu et al. 2020) (Supplemental\_File\_S5). For *B. corolliflora* and *B.*  
577 *lomatogona*, basecalling was performed using Guppy (v3.2) (<https://nanoporetech.com/>). Super high  
578 accuracy basecalling (v6) was available for read data from *P. procumbens*. A *de novo* assembly for  
579 each species was generated with Canu (v.1.8; for *P. procumbens*: v2.2) (parameters, excluding  
580 memory/threads: useGrid=1, saveReads=true, corMhapFilterThreshold=0.0000000002,  
581 ovMerThreshold=500, corMhapOptions=--threshold 0.80, --num-hashes 512, --num-min-matches 3,  
582 --ordered-sketch-size 1000, --ordered-kmer-size 14, --min-olap-length 2000, --repeat-idf-scale 50)  
583 (Koren et al. 2017). Polishing of all assemblies was performed with racon (Vaser et al. 2017), followed  
584 by two rounds of medaka (<https://github.com/nanoporetech/medaka>) and three rounds of pilon  
585 (Walker et al. 2014) as described previously (Siadjeu et al. 2020). Contigs below 100 kb were  
586 discarded. 'Decontamination' of the assembly, i.e. discarding sequences with matches to a 'black list',

## Running title: Pangenome of sugar beet and crop wild relatives

587 was performed as described previously (Siadjeu et al. 2020). The completeness of the final genome  
588 sequence assemblies (Supplemental\_File\_S6) was again assessed using BUSCO (v5.2.2) (Simão,  
589 Felipe A and Waterhouse, Robert M and Ioannidis, Panagiotis and Kriventseva, Evgenia V and  
590 Zdobnov, Evgeny M 2015) (embryophyta\_odb10 dataset, -m genome, -c 10).

591 All assemblies were generated from DNA extracted from a single plant.

### 592 Gene prediction and functional annotation

593 Prior to gene prediction, softmasking of the repeats in all genome assembly sequences was  
594 performed. A *de novo* repeat library was constructed with RepeatModeler (v2.0) (Flynn et al. 2020)  
595 including the LTR discovery pipeline. The RepBase library for each species together with the species-  
596 specific RepeatModeler library were used as input to RepeatMasker (v4.1.1) (Chen 2004).

597 The BRAKER2 pipeline (Brůna et al. 2021, 2; Lomsadze et al. 2014; Brůna et al. 2020; Lomsadze  
598 2005; Buchfink et al. 2015; Gotoh 2008; Iwata and Gotoh 2012; Stanke et al. 2008, 2006) was used  
599 for gene prediction. Protein evidence, derived from OrthoDB protein sequences (Kriventseva et al.  
600 2019) formatted with ProtHint (Brůna et al. 2020), as well as full-length sugar beet mRNA sequences  
601 from RefBeet-1.0 and RefBeet-1.5 were integrated as hints. The full-length mRNA sequences were  
602 aligned to the respective genome sequence assembly using BLAT (Kent 2002) (parameters: -fine; -  
603 q=rna). The alignments were filtered (filterPSL.pl; --best, --minCover=80, --minId=92), sorted by  
604 sequence names and begin coordinates, and then transformed into GFF format (blat2hints.pl). Both  
605 hint files, derived from RefBeet-1.0 and RefBeet1.5, were compared by alignment positions to discard  
606 the respective RefBeet-1.0 mRNA in case of an overlap with a RefBeet-1.5 mRNA. The alignments  
607 were merged to obtain the final hints file. The actual gene prediction was performed with BRAKER2  
608 in the 'etpmode'. Several scripts were used to reformat the resulting annotation file (fix\_gtf\_ids.py,  
609 gtf2gff.pl, augustus\_to\_GFF3\_adapName.pl). Predicted genes with a resulting amino acid length  
610 below 50 were removed.

611 Each gene was named according to a species abbreviation composed of the first letter of the genus  
612 name and the first letter of the species name (e.g. *P. procumbens*: Pp). The contig name was added  
613 after an underscore and then followed by the gene number (sorted by assembly coordinates). The  
614 last part of the gene name is composed of four-letter codes - either based on reciprocal best hits  
615 (RBHs) identified by BLASTn against RefBeet genes, or by a new four-letter combination.

616 All genes were functionally annotated by InterProScan (v5.52) (Quevillon et al. 2005), SwissProt  
617 BLASTX (Altschul et al. 1990) and RBH-BLAST using published RefBeet annotations. The functional  
618 annotation files are available as part of this study (10.4119/unibi/2966932).

## Running title: Pangenome of sugar beet and crop wild relatives

### 619 **Computational methods to resolve polyploid relationships**

620 An overview of the read (Supplemental\_File\_S5) and assembly datasets (Supplemental\_File\_S6),  
621 used for the different approaches to resolve the parental relationships of *B. corolliflora*, is provided.  
622 Assembly statistics were calculated with QUASt (v. 5.2.0) (Gurevich et al. 2013).

### 623 **K-mer approaches to resolve polyploid relationships**

624 To efficiently search specific  $k$ -mers in a given  $k$ -mer set, the  $k$ -mers were split into buckets based on  
625 the prefixes of length six. This corresponds to building a static trie (prefix tree) over the prefixes where  
626 the leaves of this trie are the buckets. As the trie already encodes the prefixes, only the suffixes in the  
627 buckets have to be saved in the form of sorted arrays. One can test for membership of a  $k$ -mer  $m$  by  
628 first traversing the trie along the prefix of  $m$  until a bucket is reached. If this traversal fails,  $m$  is not  
629 present in the set. If a bucket is reached successfully, a binary search in the bucket is performed. The  
630 application 'k-mer operator' (SBTTrio application; [https://github.com/ksielemann/beet\\_pangenome](https://github.com/ksielemann/beet_pangenome))  
631 was written in Java.

632 To extract unique  $k$ -mers from a sequence, a sliding window of length  $k$  is moved over the sequence.  
633 All canonical  $k$ -mers (a canonical  $k$ -mer represents the lexicographically smaller of a  $k$ -mer and the  
634 corresponding reverse complement) are inserted into a hash table. The hash function is  
635 MurmurHash3 (Appleby). An open addressing hash table with a size that is always a power of 2 was  
636 used together with a quadratic probing function ( $\frac{i(i+1)}{2}$ ) (Hopgood 1972).

637 The developed method can also be used to generate random sets of canonical  $k$ -mers. To achieve  
638 optimal time and space complexity at sampling (without replacement) random  $k$ -mers, a specific  
639 algorithm was used (sparse Fisher-Yates shuffle) (Ting 2021).

### 640 **- K-mer set operations**

641 Similarities and differences between the species-specific  $k$ -mer sets were assessed using various set  
642 operations. As input for the  $k$ -mer set operations method, we first used normalised Illumina read  
643 datasets of the potential parent species to achieve a comparable set size. Normalisation was  
644 performed with bbnorm (Bushnell) and the parameters  $k = 21$ , a target depth of 20 and a minimum  
645 threshold of 3 to discard likely erroneous reads. For the child species, the complete set of  $k$ -mers  
646 based on the read datasets was used. In addition, the set operations were performed using sequence  
647 assemblies as input.

648 For each investigated species dataset, the set of distinct canonical  $k$ -mers ( $k = 13, 21, 31$ ) was  
649 computed using the  $k$ -mer counting algorithm KMC3 (v3.2.1) (Kokot et al. 2017, 3). Based on the

## Running title: Pangenome of sugar beet and crop wild relatives

650 species-specific  $k$ -mer sets, multiple subsets were generated using different set operations. This  
651 includes the subset of  $k$ -mers present in all species (*B. corolliflora*, *B. macrorhiza*, and *B. lomatogona*),  
652 shared among two species as well as the subset of  $k$ -mers shared by two species, but not present in  
653 the third investigated species. These set operations were performed with KMC tools (v3.2.1) (Kokot  
654 et al. 2017, 3).

### 655 - Generalised trio binning

656 Trio binning is traditionally used to separate reads into two haplotype-specific sets to generate phased  
657 assemblies (Koren et al. 2018). This approach was adapted to assess the parental contributions to  
658 tetraploid *B. corolliflora*. First, the  $k$ -mer set ( $k=21$ ) for the potential parent species was calculated  
659 with KMC3 using either assemblies or high-quality, normalised (as described above) short reads as  
660 input. Then, the set of exclusive  $k$ -mers for each of the potential parent species was calculated with  
661 KMC tools (i.e. the set of  $k$ -mers present in one species, but not in the other). For the child species,  
662 a long-read dataset was used. For each read in this dataset, the number of unique canonical  $k$ -mers  
663 this read shares with the exclusive  $k$ -mer set of one of the parent candidate species was counted  
664 using the ‘ $k$ -mer operator’ described above. This number is then divided by the number of unique  
665 canonical  $k$ -mers of the read to get the ‘ $k$ -mer share’ for each potential parent. The average share of  
666 exclusive  $k$ -mers assigned to the potential parents was calculated over all reads. Only reads, for which  
667 at least half of the average  $k$ -mer share was assigned to the potential parents, are considered (the  
668 other reads contain too few  $k$ -mers exclusive to either one of the potential parental species). The goal  
669 of this filtering is to exclude reads where the overall signal is too weak to be interpreted reliably. All  
670 remaining reads were then classified into four different classes (Supplemental\_File\_S7): if the number  
671 of exclusive  $k$ -mers of a specific read is 3x higher for parent A than for parent B, the read was assigned  
672 to parent A i) (beige) and ii) *vice versa* (orange-red) (Supplemental\_File\_S7). The read was classified  
673 as ‘chimeric’ iii) if  $\frac{k\text{-mer share parent A}}{k\text{-mer share parent B}} - \frac{1}{2} \geq 0.05$  (orange). If none of the three conditions above applied,  
674 the read was ‘unclassified’ (IV) (grey). Generalised trio binning (SBTTrio application;  
675 [https://github.com/ksielemann/beet\\_pangenome](https://github.com/ksielemann/beet_pangenome)) was performed for the trio of interest (*B. corolliflora*,  
676 *B. lomatogona*, *B. macrorhiza*) as well as for other control trios to validate the approach (Table 2). *B.*  
677 *oleracea* (696 Mb) contributes a higher sequence content to allotetraploid *B. napus* in comparison to  
678 *B. rapa* (529 Mb) (Johnston 2005). For this reason, we normalised the results for this genome size  
679 difference.

### 680 - $K$ -mer fingerprinting

681 The  $k$ -mer fingerprinting approach introduces randomisation and is motivated by Fofanov *et. al.*  
682 (Fofanov et al. 2004) which suggests that small  $k$ -mer sets can be used to distinguish different  
683 organisms with high probability. The randomisation is also motivated by the prospect of minimising



## Running title: Pangenome of sugar beet and crop wild relatives

684 the impact of errors and therefore having a closer reflection of the real similarity when using the  
685 average over multiplierandom canonical  $k$ -mer sets. In general, this approach is similar to  $k$ -mer  
686 sketching.

687 To select a suitable  $k$ , the percentage of distinct canonical  $k$ -mers that are present in the dataset of  
688 each species was computed for a range of  $k$  (14-20). In accordance with Fofanov *et. al.* (Fofanov et  
689 al. 2004), a  $k$  was selected for which 5%-50% of all possible unique canonical  $k$ -mers were present  
690 in all datasets. This ensured that the different species datasets can be distinguished and that  
691 erroneous  $k$ -mers of low-quality reads do not impact the results. In general, the choice of  $k$  is a trade-  
692 off between a clear signal and computational intensity. In contrast to the previously described  $k$ -mer-  
693 based approaches, for which  $k=21$  was well suitable, here,  $k=15$  was selected based on the criterion  
694 by Fofanov *et. al.* 2004, and KMC3 was used to generate  $k$ -mer sets. The ' $k$ -mer operator' was used  
695 to build indices for all investigated datasets and to generate 100,000 random sets of size 10,000  
696 based on the whole set of all theoretically possible 15-mers. For each random set, the fingerprint, i.e.  
697 overlap with the species-specific  $k$ -mer set, was calculated. Additionally, the fingerprint intersection,  
698 i.e. the overlap of the fingerprint of the child species with the respective fingerprint of each investigated  
699 potential parent species, was computed.

700  $K$ -mer fingerprinting was performed on assembly sequences for *B. corolliflora* as child species and *B.*  
701 *lomatogona*, *B. macrorhiza*, *B. patula*, *B. vulgaris* subsp. *maritima*, *B. vulgaris* subsp. *vulgaris*, and *P.*  
702 *procumbens* as candidate parent species.

## 703 Mapping approach to resolve polyploid relationships

### 704 - Synthetic read mapping

705 As input, synthetic reads were generated from the sequence assembly of the child species (*B.*  
706 *corolliflora*). These synthetic reads were extracted by splitting each contig into equal length fragments  
707 starting from the beginning of the contig. The synthetic reads were then mapped simultaneously  
708 against the sequence assemblies of the two potential parent species (*B. lomatogona* and *B.*  
709 *macrorhiza*) using minimap2 within the corresponding Python wrapper mappy (v2.24) (Li 2018). The  
710 reads were then assigned to four categories either i) mapping to both potential parents, ii) mapping  
711 exclusively to parent A, iii) exclusively to parent B, or iv) not mapping to either of the parent  
712 candidates. A synthetic read length of 5 kb, 10 kb, and 20 kb was selected and only primary mappings  
713 with a sequence identity of at least 60% were considered. For comparability between the *B.*  
714 *lomatogona* long read-based and the *B. macrorhiza* short read assembly, in a second approach, the  
715 *B. lomatogona* assembly sequence was shredded into 5 kb (= smaller than the N50 of the *B.*  
716 *macrorhiza* assembly) chunks prior to the mapping procedure.

## Running title: Pangenome of sugar beet and crop wild relatives

### 717 **Gene-based approach to resolve polyploid relationships**

718 Phylogenetic distances of BUSCO gene sequences were calculated between tetraploid *B. corolliflora*,  
719 the potential parents, *B. vulgaris* subsp. *vulgaris*, *P. procumbens* and three related outgroup long-  
720 read genome sequence assemblies of the Caryophyllales (*Simmondsia chinensis* (jojoba;  
721 GCA\_018398585.1), *Spinacia oleracea* (spinach; GCF\_002007265.1), and *Amaranthus*  
722 *hypochondriacus* (amaranth; GCA\_000753965.2)). For all eight species, BUSCO (v5.2.2) (Simão,  
723 Felipe A and Waterhouse, Robert M and Ioannidis, Panagiotis and Kriventseva, Evgenia V and  
724 Zdobnov, Evgeny M 2015) (embryophyta\_odb10 dataset) was run in genome mode. Afterwards,  
725 suitable BUSCO genes were extracted. The final set of single copy (can be duplicated in the tetraploid  
726 *B. corolliflora*), complete BUSCO genes present in all six genome sequences comprised 140 genes.  
727 A multiple FASTA file was constructed for each gene and served as input for sequence alignment  
728 with MAFFT v7.299b (L-INS-I method; --adjustdirection) (Kato, Kazutaka and Standley, Daron M  
729 2013). The alignments were trimmed with trimAl (v1.4.rev22) (Capella-Gutierrez et al. 2009) to  
730 achieve 100% occupancy, which means that only SNVs were considered for the phylogenetic  
731 distance whereas InDels, possibly derived from assembly or gene structure annotation errors, were  
732 not considered. Single gene trees were constructed using FastTree (v2.1.11) (Price, Morgan N and  
733 Dehal, Paramvir S and Arkin, Adam P 2010). The phylogenetic distance of each parental gene to the  
734 closest related *B. corolliflora* gene was assessed using the DendroPy library (Sukumaran and Holder  
735 2010). A Mann-Whitney-U test, implemented in the SciPy package (Jones et al. 2001), was  
736 calculated.

### 737 **Identification of lost/conserved regions in the pangenome**

738 Illumina short reads of the sugar beet reference accession KWS2320 were used  
739 (Supplemental\_File\_S8) as input. After quality check, these reads were mapped against all six  
740 available wild beet genome sequence assemblies using BWA-MEM (v0.7.13) (-t 20, -c 1000) (Li  
741 2013). In addition to the genomic resources presented in this study, we used two published genome  
742 sequence assemblies and annotations from *B. patula* and *B. vulgaris* subsp. *maritima*  
743 (<http://bvseq.boku.ac.at/Genome/Download/>) (Rodríguez del Río et al. 2019). The resulting SAM files  
744 were converted to BAM format using samtools (v1.15.1) (Li et al. 2009), then sorted (samtools sort),  
745 and duplicates were removed (samtools markdup). The whole workflow for the identification of regions  
746 of interest is visualised in Supplemental\_File\_S9, A. First, only mapped reads with a length greater  
747 than 80 bp and exclusively primary mappings were kept for further analyses to ensure a high-quality  
748 input dataset. The coverage per position was determined using genomeCoverageBed (v2.27.1) (-d, -  
749 split) (Quinlan and Hall 2010). Variant calling was performed with bcftools (v1.11) (Danecek et al.  
750 2021) and the resulting variants were filtered for quality (QUAL Phred-score  $\geq$  30). Each position of

## Running title: Pangenome of sugar beet and crop wild relatives

751 the sequence was qualitatively assessed so that either a variant was present at a specific position  
752 (1), or no variant was detected (0).

753 The average coverage per base as well as the average variance per base was calculated in a sliding  
754 window approach. The approximate average gene length in sugar beet is 5 kb (based on the  
755 KWS2320ONT v1.0 p1.0 annotation). To ensure high sensitivity and as consecutive conserved  
756 regions are later merged into a single window, a window size of 2,500 bp was selected. An example  
757 region is shown in Supplemental\_File\_S10. The shift size of 150 bp means that the first window spans  
758 the region from 0 bp to 5,000 bp, whereas the second window spans the region from 150 bp to 5,150  
759 bp (Supplemental\_File\_S9, B). All parameters can be selected by the user depending on the  
760 application.

761 As stated above, regions not present in cultivated sugar beet KWS2320 should be associated with  
762 low/no coverage in the crop wild relatives. To get these 'zero coverage regions', after the extraction  
763 of primary mappings, a maximal coverage of 1% of the mean coverage per contig was set as filter  
764 criterion. As short-read assemblies are highly fragmented and short contigs are present, the coverage  
765 was normalised in these cases by the value calculated from the whole assembly (for *B. vulgaris* subsp.  
766 *maritima*, *B. patula*, and *B. macrorhiza*).

767 As *B. vulgaris* subsp. *maritima* is known to be the progenitor of the cultivated sugar beet (Biancardi  
768 and Lewellen 2020), the pangenome dataset was also harnessed to identify regions originally derived  
769 from the progenitor (sea beet WB42) and still conserved in the descendant (cultivated sugar beet  
770 KWS2320) (Supplemental\_File\_S4). A conserved region between sea beet and sugar beet was  
771 defined as follows. If the region derives from sea beet, the *B. vulgaris* subsp. *maritima* reads should  
772 map to the corresponding, conserved region in the sugar beet genome sequence. Therefore, the  
773 coverage should be at least as high as the mean coverage across the respective contig. To exclude  
774 highly repetitive sequences, an upper threshold was defined as well (at most 3x the mean coverage  
775 for each contig). On the other hand, the expected variance for conserved and therefore similar regions  
776 in both sequences should be relatively low. The maximal variance per base threshold was set to 0.4  
777 times the average variance per base of the respective contig (sum of all variants of the contig divided  
778 by the contig length x 0.4).

779 All identified lost/conserved regions were then further investigated. First, based on the structural  
780 annotations of all assemblies, gene sequences, which are located within the identified regions, were  
781 extracted. Genes were considered to be located within a specific region if at least 70% of the bases  
782 were covered. The corresponding amino acid sequences were used for the next step. To functionally  
783 characterise the extracted genes, RBHs with *A. thaliana* amino acid sequences were determined and  
784 the corresponding *A. thaliana* gene identifiers were assigned to the respective beet gene. In addition,

## Running title: Pangenome of sugar beet and crop wild relatives

785 the functional annotation file for *B. corolliflora*, *B. lomatogona*, *B. macrorhiza*, and *P. procumbens*,  
786 which was generated in this study (10.4119/unibi/2966932), was investigated to further functionally  
787 assess the identified genes.

## 788 Chromosome preparation and fluorescent *in situ* hybridisation

789 Mitotic chromosomes were prepared from young meristematic leaves of *B. corolliflora* (BETA 408),  
790 *B. lomatogona* (BETA 674) and *B. macrorhiza* (BETA 830) as described previously (Schmidt et al.  
791 2021, 2023). Probes for the satellite DNAs pRN1 (Kubis et al. 1997), GenBank accession number  
792 Z69354.1) and BISat1 (Hong Ha 2018) were labelled by PCR in the presence of biotin-16-dUTP  
793 (Roche Diagnostics) detected by streptavidin-Cy3 (Sigma–Aldrich) or digoxigenin-11-dUTP (Jena  
794 Bioscience) detected by antidigoxigenin-fluorescein isothiocyanate (FITC; Roche Diagnostics). The  
795 18S rDNA probe was labelled with DY415-dUTP (Dyomics). All probe nucleotide sequences are listed  
796 in the Supplemental\_File\_S11. Chromosomes were counterstained with DAPI (4',6'-diamidino-2-  
797 phenylindole; Böhringer, Mannheim) and mounted in antifade solution (CitiFluor; Agar Scientific,  
798 Stansted). The hybridization procedure as well as the image acquisition were performed as described  
799 previously (Schmidt et al. 2021; Liedtke et al. 2022). The hybridization stringency was 79%.

800

## 801 Declarations

## 802 Ethics approval and consent to participate

803 The material of the IPK Gatersleben was transferred under the regulations of the standard material transfer  
804 agreement (SMTA) of the International Treaty. Plants were grown in accordance with German legislation.

## 805 Consent for publication

806 Not applicable.

## 807 Availability of data and materials

808 ONT reads, Illumina reads, and genome assemblies generated for this study were submitted to ENA  
809 (PRJEB56520). The sources/IDs are summarised in Additional files S5 and S6. The structural and functional  
810 annotation files for all generated wild beet assemblies are available on 'PUB-Publications at Bielefeld University'  
811 (10.4119/unibi/2966932). Relevant scripts for the investigation of the parental relationships of *B. corolliflora* and  
812 for the identification of lost/conserved regions are available on GitHub  
813 ([https://github.com/ksielemann/beet\\_pangenome](https://github.com/ksielemann/beet_pangenome); <https://doi.org/10.5281/zenodo.8090593>).

## 814 Competing interests

## Running title: Pangenome of sugar beet and crop wild relatives

815 The authors declare no competing interests.

### 816 Funding

817 KS is funded by Bielefeld University through the Graduate School DILS (Digital Infrastructure for the Life  
818 Sciences). The bench fee was contributed from internal resources of the chair of Genetics and Genomics of  
819 Plants through core funding from Bielefeld University/Faculty of Biology.

### 820 Authors' contributions

821 KS, BP, BW, TH, and DH designed the study. NS selected and cultivated the plants. NS, KS, and BP performed  
822 DNA extraction. PV and BP designed the layout for sequencing and performed sequencing. KS, JG, and NK  
823 developed and implemented the bioinformatic methodology. SB and NS performed the generation of probes  
824 and hybridisation experiments. KS, NS, JG, and NK analysed the data and prepared the figures and tables. KS,  
825 NS, JG, NK, BP, and TH wrote the manuscript. All authors read and approved the final manuscript.

### 826 Acknowledgements

827 We thank the CeBiTec Bioinformatic Resource Facility team for excellent technical support. We acknowledge  
828 the Genbank Gatersleben for providing seeds and data for the investigated accessions. This work was  
829 supported by the BMBF-funded de.NBI Cloud within the German Network for Bioinformatics Infrastructure  
830 (de.NBI) (031A532B, 031A533A, 031A533B, 031A534A, 031A535A, 031A537A, 031A537B, 031A537C,  
831 031A537D, 031A538A).

832

### 833 References

- 834 Adams KL, Wendel JF. 2005. Polyploidy and genome evolution in plants. *Curr Opin Plant Biol* **8**: 135–141.
- 835 Altschul SF, Gish W, Miller W, Myers EW, Lipman DJ. 1990. Basic local alignment search tool. *J Mol Biol* **215**: 403–410.
- 836 Andrews S. 2020. FastQC: a quality control tool for high throughput sequence data.  
837 <http://www.bioinformatics.babraham.ac.uk/projects/fastqc>.
- 838 Appleby A. Murmurhash3: <https://github.com/aappleby/smhasher>. <https://github.com/aappleby/smhasher>.
- 839 Arnaiz A, Talavera-Mateo L, Gonzalez-Melendi P, Martinez M, Diaz I, Santamaria ME. 2018. Arabidopsis Kunitz Trypsin  
840 Inhibitors in Defense Against Spider Mites. *Front Plant Sci* **9**: 986.
- 841 Bairoch A, Boeckmann B. 1991. The SWISS-PROT protein sequence data bank. *Nucleic Acids Res* **19**: 2247–2249.
- 842 Bayer PE, Golicz AA, Scheben A, Batley J, Edwards D. 2020. Plant pan-genomes are the new reference. *Nat Plants* **6**: 914–  
843 920.
- 844 Bayer PE, Scheben A, Golicz AA, Yuan Y, Faure S, Lee H, Chawla HS, Anderson R, Bancroft I, Raman H, et al. 2021.  
845 Modelling of gene loss propensity in the pangenomes of three *Brassica* species suggests different mechanisms  
846 between polyploids and diploids. *Plant Biotechnol J* **19**: 2488–2500.
- 847 Berardini TZ, Reiser L, Li D, Mezheritsky Y, Muller R, Strait E, Huala E. 2015. The arabidopsis information resource: Making  
848 and mining the “gold standard” annotated reference plant genome: Tair: Making and Mining the “Gold Standard”  
849 Plant Genome. *genesis* **53**: 474–485.

## Running title: Pangenome of sugar beet and crop wild relatives

- 850 Biancardi E, Lewellen RT. 2020. History and Current Importance. In *Beta maritima* (eds. E. Biancardi, L.W. Panella, and  
851 J.M. McGrath), pp. 1–48, Springer International Publishing, Cham [http://link.springer.com/10.1007/978-3-030-28748-1\\_1](http://link.springer.com/10.1007/978-3-030-28748-1_1) (Accessed July 28, 2021).
- 853 Bianchet C, Wong A, Quaglia M, Alqurashi M, Gehring C, Ntoukakis V, Pasqualini S. 2019. An *Arabidopsis thaliana* leucine-  
854 rich repeat protein harbors an adenylyl cyclase catalytic center and affects responses to pathogens. *J Plant Physiol*  
855 **232**: 12–22.
- 856 Bolger AM, Lohse M, Usadel B. 2014. Trimmomatic: a flexible trimmer for Illumina sequence data. *Bioinformatics* **30**: 2114–  
857 2120.
- 858 Brúna T, Hoff KJ, Lomsadze A, Stanke M, Borodovsky M. 2021. BRAKER2: automatic eukaryotic genome annotation with  
859 GeneMark-EP+ and AUGUSTUS supported by a protein database. *NAR Genomics Bioinforma* **3**: lqaa108.
- 860 Brúna T, Lomsadze A, Borodovsky M. 2020. GeneMark-EP+: eukaryotic gene prediction with self-training in the space of  
861 genes and proteins. *NAR Genomics Bioinforma* **2**: lqaa026.
- 862 Buchfink B, Xie C, Huson DH. 2015. Fast and sensitive protein alignment using DIAMOND. *Nat Methods* **12**: 59–60.
- 863 Burenin VI, Lisitsyna II, Lisitsyn EM. 1994. Breeding of cold tolerant sugar beet for vigorous seedling growth and high yield.  
864 *Jpn Hokkaido Natl Exp Stn* 125–128.
- 865 Bushnell B. Bbmap: [sourceforge.net/projects/bbmap/](https://sourceforge.net/projects/bbmap/). [sourceforge.net/projects/bbmap/](https://sourceforge.net/projects/bbmap/).
- 866 Cai D, Kleine M, Kifle S, Harloff H-J, Sandal NN, Marcker KA, Klein-Lankhorst RM, Salentijn EMJ, Lange W, Stiekema WJ,  
867 et al. 1997. Positional Cloning of a Gene for Nematode Resistance in Sugar Beet. *Science* **275**: 832–834.
- 868 Capella-Gutierrez S, Silla-Martinez JM, Gabaldon T. 2009. trimAl: a tool for automated alignment trimming in large-scale  
869 phylogenetic analyses. *Bioinformatics* **25**: 1972–1973.
- 870 Capistrano-Gossmann GG, Ries D, Holtgräwe D, Minoche A, Kraft T, Frerichmann SLM, Rosleff Soerensen T, Dohm JC,  
871 González I, Schilhabel M, et al. 2017. Crop wild relative populations of *Beta vulgaris* allow direct mapping of  
872 agronomically important genes. *Nat Commun* **8**: 15708.
- 873 Chen N. 2004. Using REPEAT MASKER to Identify Repetitive Elements in Genomic Sequences. *Curr Protoc Bioinforma* **5**.  
874 <https://onlinelibrary.wiley.com/doi/10.1002/0471250953.bi0410s05> (Accessed November 28, 2022).
- 875 Chung HY, Sunter G. 2014. Interaction between the transcription factor AtTIFY4B and begomovirus AL2 protein impacts  
876 pathogenicity. *Plant Mol Biol* **86**: 185–200.
- 877 Clavijo BJ, Accinelli GG, Yanes L, Barr K, Wright J. 2017. *Skip-mers: increasing entropy and sensitivity to detect conserved*  
878 *genic regions with simple cyclic q-grams*. *Bioinformatics* <http://biorxiv.org/lookup/doi/10.1101/179960> (Accessed  
879 November 28, 2022).
- 880 Cooley MB, Pathirana S, Wu H-J, Kachroo P, Klessig DF. 2000. Members of the *Arabidopsis HRT/RPP8* Family of  
881 Resistance Genes Confer Resistance to Both Viral and Oomycete Pathogens. *Plant Cell* **12**: 663–676.
- 882 Danecek P, Bonfield JK, Liddle J, Marshall J, Ohan V, Pollard MO, Whitwham A, Keane T, McCarthy SA, Davies RM, et al.  
883 2021. Twelve years of SAMtools and BCFtools. *GigaScience* **10**: giab008.
- 884 Desel C. 2002. Painting of Parental Chromatin in Beta Hybrids by Multi-colour Fluorescent in situ Hybridization. *Ann Bot* **89**:  
885 171–181.
- 886 Didelon M, Khafif M, Godiard L, Barbacci A, Raffaele S. 2020. Patterns of Sequence and Expression Diversification  
887 Associate Members of the PADRE Gene Family With Response to Fungal Pathogens. *Front Genet* **11**: 491.
- 888 Dohm JC, Minoche AE, Holtgräwe D, Capella-Gutiérrez S, Zakrzewski F, Tafer H, Rupp O, Sörensen TR, Stracke R,  
889 Reinhardt R, et al. 2014. The genome of the recently domesticated crop plant sugar beet (*Beta vulgaris*). *Nature*  
890 **505**: 546–549.
- 891 Flynn JM, Hubley R, Goubert C, Rosen J, Clark AG, Feschotte C, Smit AF. 2020. RepeatModeler2 for automated genomic  
892 discovery of transposable element families. *Proc Natl Acad Sci* **117**: 9451–9457.

## Running title: Pangenome of sugar beet and crop wild relatives

- 893 Fofanov Y, Luo Y, Katili C, Wang J, Belosludtsev Y, Powdrill T, Belapurkar C, Fofanov V, Li T-B, Chumakov S, et al. 2004.  
894 How independent are the appearances of n-mers in different genomes? *Bioinformatics* **20**: 2421–2428.
- 895 Frese L, Ford-Lloyd B. 2020. Taxonomy, Phylogeny, and the Genepool. In *Beta maritima* (eds. E. Biancardi, L.W. Panella,  
896 and J.M. McGrath), pp. 121–151, Springer International Publishing, Cham [http://link.springer.com/10.1007/978-3-030-28748-1\\_6](http://link.springer.com/10.1007/978-3-030-28748-1_6) (Accessed July 28, 2021).  
897
- 898 Gotoh O. 2008. A space-efficient and accurate method for mapping and aligning cDNA sequences onto genomic sequence.  
899 *Nucleic Acids Res* **36**: 2630–2638.
- 900 Gurevich A, Saveliev V, Vyahhi N, Tesler G. 2013. QUAST: quality assessment tool for genome assemblies. *Bioinformatics*  
901 **29**: 1072–1075.
- 902 Heitkam T, Weber B, Walter I, Liedtke S, Ost C, Schmidt T. 2020. Satellite DNA landscapes after allotetraploidization of  
903 quinoa (*Chenopodium quinoa*) reveal unique A and B subgenomes. *Plant J* **103**: 32–52.
- 904 Holtgräwe D. Low coverage re-sequencing in *Beta vulgaris* (sugar beet) for anchoring assembly sequences to genomic  
905 position. [https://jbrowse.cebitec.uni-  
906 bielefeld.de/RefBeet1.5/?loc=Chr1%3A22464012..33694158&tracks=DNA&highlight=](https://jbrowse.cebitec.uni-bielefeld.de/RefBeet1.5/?loc=Chr1%3A22464012..33694158&tracks=DNA&highlight=).
- 907 Hong Ha B. 2018. Structure, organization, and evolution of satellite DNAs in species of the genera *Beta* and *Patellifolia*. TU  
908 Dresden.
- 909 Hopgood FRA. 1972. The quadratic hash method when the table size is a power of 2. *Comput J* **15**: 314–315.
- 910 Iwata H, Gotoh O. 2012. Benchmarking spliced alignment programs including Spaln2, an extended version of Spaln that  
911 incorporates additional species-specific features. *Nucleic Acids Res* **40**: e161–e161.
- 912 Jabran K, Florentine S, Chauhan BS. 2020. Impacts of Climate Change on Weeds, Insect Pests, Plant Diseases and Crop  
913 Yields: Synthesis. In *Crop Protection Under Changing Climate* (eds. K. Jabran, S. Florentine, and B.S. Chauhan),  
914 pp. 189–195, Springer International Publishing, Cham [http://link.springer.com/10.1007/978-3-030-46111-9\\_8](http://link.springer.com/10.1007/978-3-030-46111-9_8)  
915 (Accessed January 3, 2023).
- 916 Johnston JS. 2005. Evolution of Genome Size in Brassicaceae. *Ann Bot* **95**: 229–235.
- 917 Jones E, Oliphant T, Peterson P, others. 2001. SciPy: Open source scientific tools for Python.
- 918 Katoh, Kazutaka and Standley, Daron M. 2013. MAFFT multiple sequence alignment software version 7: improvements in  
919 performance and usability. *Mol Biol Evol* **30**: 772–780.
- 920 Kent WJ. 2002. BLAT---The BLAST-Like Alignment Tool. *Genome Res* **12**: 656–664.
- 921 Kokot M, Długosz M, Deorowicz S. 2017. KMC 3: counting and manipulating k-mer statistics ed. B. Berger. *Bioinformatics*  
922 **33**: 2759–2761.
- 923 Koren S, Rhie A, Walenz BP, Dilthey AT, Bickhart DM, Kingan SB, Hiendleder S, Williams JL, Smith TPL, Phillippy AM.  
924 2018. De novo assembly of haplotype-resolved genomes with trio binning. *Nat Biotechnol* **36**: 1174–1182.
- 925 Koren S, Walenz BP, Berlin K, Miller JR, Bergman NH, Phillippy AM. 2017. Canu: scalable and accurate long-read assembly  
926 via adaptive k-mer weighting and repeat separation. *Genome Res* **27**: 722–736.
- 927 Kriventseva EV, Kuznetsov D, Tegenfeldt F, Manni M, Dias R, Simão FA, Zdobnov EM. 2019. OrthoDB v10: sampling the  
928 diversity of animal, plant, fungal, protist, bacterial and viral genomes for evolutionary and functional annotations of  
929 orthologs. *Nucleic Acids Res* **47**: D807–D811.
- 930 Kubis S, Heslop-Harrison JS, Schmidt T. 1997. A Family of Differentially Amplified Repetitive DNA Sequences in the Genus  
931 *Beta* Reveals Genetic Variation in *Beta vulgaris* Subspecies and Cultivars. *J Mol Evol* **44**: 310–320.
- 932 Li H. 2013. Aligning sequence reads, clone sequences and assembly contigs with BWA-MEM. *ArXiv Prepr ArXiv13033997*.
- 933 Li H. 2018. Minimap2: pairwise alignment for nucleotide sequences ed. I. Birol. *Bioinformatics* **34**: 3094–3100.
- 934 Li H, Handsaker B, Wysoker A, Fennell T, Ruan J, Homer N, Marth G, Abecasis G, Durbin R, 1000 Genome Project Data  
935 Processing Subgroup. 2009. The Sequence Alignment/Map format and SAMtools. *Bioinformatics* **25**: 2078–2079.

## Running title: Pangenome of sugar beet and crop wild relatives

- 936 Li J, Galla A, Avila CA, Flattmann K, Vaughn K, Goggin FL. 2021. Fatty Acid Desaturases in the Chloroplast and  
937 Endoplasmic Reticulum Promote Susceptibility to the Green Peach Aphid *Myzus persicae* in *Arabidopsis thaliana*.  
938 *Mol Plant-Microbe Interactions* **34**: 691–702.
- 939 Liedtke S, Breitenbach S, Heitkam T. 2022. FISH—in Plant Chromosomes. In *Cytogenetics and Molecular Cytogenetics*,  
940 pp. 339–352, CRC Press, Boca Raton  
941 <https://www.taylorfrancis.com/books/9781003223658/chapters/10.1201/9781003223658-28> (Accessed June 7,  
942 2023).
- 943 Lomsadze A. 2005. Gene identification in novel eukaryotic genomes by self-training algorithm. *Nucleic Acids Res* **33**: 6494–  
944 6506.
- 945 Lomsadze A, Burns PD, Borodovsky M. 2014. Integration of mapped RNA-Seq reads into automatic training of eukaryotic  
946 gene finding algorithm. *Nucleic Acids Res* **42**: e119–e119.
- 947 Love RR, Weisenfeld NI, Jaffe DB, Besansky NJ, Neafsey DE. 2016. Evaluation of DISCOVAR de novo using a mosquito  
948 sample for cost-effective short-read genome assembly. *BMC Genomics* **17**: 187.
- 949 Lu K, Wei L, Li X, Wang Y, Wu J, Liu M, Zhang C, Chen Z, Xiao Z, Jian H, et al. 2019. Whole-genome resequencing reveals  
950 Brassica napus origin and genetic loci involved in its improvement. *Nat Commun* **10**: 1154.
- 951 Mason AS, Wendel JF. 2020. Homoeologous Exchanges, Segmental Allopolyploidy, and Polyploid Genome Evolution. *Front*  
952 *Genet* **11**: 1014.
- 953 Minoche AE, Dohm JC, Schneider J, Holtgräwe D, Viehöver P, Montfort M, Rosleff Sörensen T, Weisshaar B, Himmelbauer  
954 H. 2015. Exploiting single-molecule transcript sequencing for eukaryotic gene prediction. *Genome Biol* **16**: 184.
- 955 Monteiro F, Frese L, Castro S, Duarte MC, Paulo OS, Loureiro J, Romeiras MM. 2018. Genetic and Genomic Tools to  
956 Assist Sugar Beet Improvement: The Value of the Crop Wild Relatives. *Front Plant Sci* **9**: 74.
- 957 Ober ES, Rajabi A. 2010. Abiotic Stress in Sugar Beet. *Sugar Tech* **12**: 294–298.
- 958 Ondov BD, Treangen TJ, Melsted P, Mallonee AB, Bergman NH, Koren S, Phillippy AM. 2016. Mash: fast genome and  
959 metagenome distance estimation using MinHash. *Genome Biol* **17**: 132.
- 960 Otto SP, Whitton J. 2000. Polyploid incidence and evolution. *Annu Rev Genet* **34**: 401–437.
- 961 Paesold S, Borchardt D, Schmidt T, Dechyeva D. 2012. A sugar beet ( *Beta vulgaris* L.) reference FISH karyotype for  
962 chromosome and chromosome-arm identification, integration of genetic linkage groups and analysis of major  
963 repeat family distribution: *Sugar beet FISH karyotype*. *Plant J* **72**: 600–611.
- 964 Panella LW, Stevanato P, Pavli O, Skaracis G. 2020. Source of Useful Traits. In *Beta maritima* (eds. E. Biancardi, L.W.  
965 Panella, and J.M. McGrath), pp. 167–218, Springer International Publishing, Cham  
966 [http://link.springer.com/10.1007/978-3-030-28748-1\\_8](http://link.springer.com/10.1007/978-3-030-28748-1_8) (Accessed July 29, 2021).
- 967 Pinheiro C, Ribeiro IC, Reisinger V, Planchon S, Veloso MM, Renaut J, Eichacker L, Ricardo CP. 2018. Salinity effect on  
968 germination, seedling growth and cotyledon membrane complexes of a Portuguese salt marsh wild beet ecotype.  
969 *Theor Exp Plant Physiol* **30**: 113–127.
- 970 Price, Morgan N and Dehal, Paramvir S and Arkin, Adam P. 2010. FastTree 2—approximately maximum-likelihood trees for  
971 large alignments. *PLoS One* **5**: e9490.
- 972 Quevillon E, Silventoinen V, Pillai S, Harte N, Mulder N, Apweiler R, Lopez R. 2005. InterProScan: protein domains identifier.  
973 *Nucleic Acids Res* **33**: W116–W120.
- 974 Quinlan AR, Hall IM. 2010. BEDTools: a flexible suite of utilities for comparing genomic features. *Bioinformatics* **26**: 841–  
975 842.
- 976 Reamon-Büttner SM, Wricke G, Frese L. 1996. Interspecific relationship and genetic diversity in wild beets in section  
977 Corollinae genus Beta: Isozyme and RAPD analyses. *Genet Resour Crop Evol* **43**: 261–274.
- 978 Reynolds HT, Dickson RC, Hannibal RM, Laird EF. 1967. Effects of the Green Peach Aphid, Southern Garden Leafhopper,  
979 and Carmine Spider Mite Populations upon Yield of Sugar Beets in the Imperial Valley, California. *J Econ*  
980 *Entomol* **60**: 1–7.



## Running title: Pangenome of sugar beet and crop wild relatives

- 981 Ristaino JB, Anderson PK, Bebbler DP, Brauman KA, Cunniffe NJ, Fedoroff NV, Finegold C, Garrett KA, Gilligan CA, Jones  
982 CM, et al. 2021. The persistent threat of emerging plant disease pandemics to global food security. *Proc Natl Acad*  
983 *Sci* **118**: e2022239118.
- 984 Rodríguez del Río Á, Minoche AE, Zwickl NF, Friedrich A, Liedtke S, Schmidt T, Himmelbauer H, Dohm JC. 2019. Genomes  
985 of the wild beets *Beta patula* and *Beta vulgaris* ssp. *maritima*. *Plant J* **99**: 1242–1253.
- 986 Romeiras MM, Vieira A, Silva DN, Moura M, Santos-Guerra A, Batista D, Duarte MC, Paulo OS. 2016. Evolutionary and  
987 Biogeographic Insights on the Macaronesian Beta-Patellifolia Species (Amaranthaceae) from a Time-Scaled  
988 Molecular Phylogeny ed. T. Robillard. *PLOS ONE* **11**: e0152456.
- 989 Ross MG, Russ C, Costello M, Hollinger A, Lennon NJ, Hegarty R, Nusbaum C, Jaffe DB. 2013. Characterizing and  
990 measuring bias in sequence data. *Genome Biol* **14**: R51.
- 991 Schmidt N, Seibt KM, Weber B, Schwarzacher T, Schmidt T, Heitkam T. 2021. Broken, silent, and in hiding: tamed  
992 endogenous pararetroviruses escape elimination from the genome of sugar beet ( *Beta vulgaris* ). *Ann Bot* **128**:  
993 281–299.
- 994 Schmidt N, Weber B, Klekar J, Liedtke S, Breitenbach S, Heitkam T. 2023. Preparation of Mitotic Chromosomes with the  
995 Dropping Technique. In *Plant Cytogenetics and Cytogenomics* (eds. T. Heitkam and S. Garcia), Vol. 2672 of  
996 *Methods in Molecular Biology*, pp. 151–162, Springer US, New York, NY [https://link.springer.com/10.1007/978-1-0716-3226-0\\_8](https://link.springer.com/10.1007/978-1-0716-3226-0_8) (Accessed June 26, 2023).
- 998 Schmidt T, Heitkam T, Liedtke S, Schubert V, Menzel G. 2019. Adding color to a century-old enigma: multi-color  
999 chromosome identification unravels the autotriploid nature of saffron ( *Crocus sativus* ) as a hybrid of wild *Crocus*  
1000 *cartwrightianus* cytotypes. *New Phytol* **222**: 1965–1980.
- 1001 Shah SJ, Anjam MS, Mendy B, Anwer MA, Habash SS, Lozano-Torres JL, Grundler FMW, Siddique S. 2017. Damage-  
1002 associated responses of the host contribute to defence against cyst nematodes but not root-knot nematodes. *J*  
1003 *Exp Bot* **68**: 5949–5960.
- 1004 Siadjeu C, Pucker B, Viehöver P, Albach DC, Weisshaar B. 2020. High Contiguity de novo Genome Sequence Assembly of  
1005 Trifoliolate Yam (*Dioscorea dumetorum*) Using Long Read Sequencing. *Genes* **11**: 274.
- 1006 Sielemann K, Pucker B, Orsini E, Elashry A, Schulte L, Viehöver P, Müller AE, Schechert A, Weisshaar B, Holtgräwe D.  
1007 2023. *Genomic characterization of a nematode tolerance locus in sugar beet*. *Plant Biology*  
1008 <http://biorxiv.org/lookup/doi/10.1101/2023.06.22.546034> (Accessed June 28, 2023).
- 1009 Sielemann K, Pucker B, Schmidt N, Viehöver P, Weisshaar B, Heitkam T, Holtgräwe D. 2022. Complete pan-plastome  
1010 sequences enable high resolution phylogenetic classification of sugar beet and closely related crop wild relatives.  
1011 *BMC Genomics* **23**: 113.
- 1012 Simão, Felipe A and Waterhouse, Robert M and Ioannidis, Panagiotis and Kriventseva, Evgenia V and Zdobnov, Evgeny  
1013 M. 2015. BUSCO: assessing genome assembly and annotation completeness with single-copy orthologs.  
1014 *Bioinformatics* **31**: 3210–3212.
- 1015 Skorupa M, Gołębiewski M, Kurnik K, Niedojadło J, Kęsy J, Klamkowski K, Wójcik K, Treder W, Tretyn A, Tyburski J. 2019.  
1016 Salt stress vs. salt shock - the case of sugar beet and its halophytic ancestor. *BMC Plant Biol* **19**: 57.
- 1017 Song J, Bradeen JM, Naess SK, Raasch JA, Wielgus SM, Haberlach GT, Liu J, Kuang H, Austin-Phillips S, Buell CR, et al.  
1018 2003. Gene *RB* cloned from *Solanum bulbocastanum* confers broad spectrum resistance to potato late blight. *Proc*  
1019 *Natl Acad Sci* **100**: 9128–9133.
- 1020 Stanke M, Diekhans M, Baertsch R, Haussler D. 2008. Using native and syntenically mapped cDNA alignments to improve  
1021 de novo gene finding. *Bioinformatics* **24**: 637–644.
- 1022 Stanke M, Schöffmann O, Morgenstern B, Waack S. 2006. Gene prediction in eukaryotes with a generalized hidden Markov  
1023 model that uses hints from external sources. *BMC Bioinformatics* **7**: 62.
- 1024 Sukumaran J, Holder MT. 2010. DendroPy: a Python library for phylogenetic computing. *Bioinformatics* **26**: 1569–1571.
- 1025 Sylvester ES. 1956. Beet mosaic and beet yellows virus transmission by the green peach aphid. *J Amer Soc Sug Beet Tech*  
1026 56–61.

## Running title: Pangenome of sugar beet and crop wild relatives

- 1027 Ting D. 2021. Simple, Optimal Algorithms for Random Sampling Without Replacement. <https://arxiv.org/abs/2104.05091>  
1028 (Accessed November 28, 2022).
- 1029 Van de Peer Y, Ashman T-L, Soltis PS, Soltis DE. 2021. Erratum to: Polyploidy: an evolutionary and ecological force in  
1030 stressful times. *Plant Cell* **33**: 2899–2899.
- 1031 Van de Peer Y, Mizrahi E, Marchal K. 2017. The evolutionary significance of polyploidy. *Nat Rev Genet* **18**: 411–424.
- 1032 van der Vossen E, Sikkema A, Hekkert B te L, Gros J, Stevens P, Muskens M, Wouters D, Pereira A, Stiekema W, Allefs  
1033 S. 2003. An ancient *R* gene from the wild potato species *Solanum bulbocastanum* confers broad-spectrum  
1034 resistance to *Phytophthora infestans* in cultivated potato and tomato. *Plant J* **36**: 867–882.
- 1035 VanWallendael A, Alvarez M. 2022. Alignment-free methods for polyploid genomes: Quick and reliable genetic distance  
1036 estimation. *Mol Ecol Resour* **22**: 612–622.
- 1037 Vaser R, Sović I, Nagarajan N, Šikić M. 2017. Fast and accurate de novo genome assembly from long uncorrected reads.  
1038 *Genome Res* **27**: 737–746.
- 1039 Walker BJ, Abeel T, Shea T, Priest M, Abouelliel A, Sakthikumar S, Cuomo CA, Zeng Q, Wortman J, Young SK, et al. 2014.  
1040 Pilon: An Integrated Tool for Comprehensive Microbial Variant Detection and Genome Assembly Improvement ed.  
1041 J. Wang. *PLoS ONE* **9**: e112963.
- 1042 Wang Z, Wang M, Liu L, Meng F. 2013. Physiological and Proteomic Responses of Diploid and Tetraploid Black Locust  
1043 (*Robinia pseudoacacia* L.) Subjected to Salt Stress. *Int J Mol Sci* **14**: 20299–20325.
- 1044 Wascher FL, Stralis-Pavese N, McGrath JM, Schulz B, Himmelbauer H, Dohm JC. 2022. Genomic distances reveal  
1045 relationships of wild and cultivated beets. *Nat Commun* **13**: 2021.
- 1046 Yazdi HRB, Heydarnejad J, Massumi H. 2008. Genome characterization and genetic diversity of beet curly top Iran virus: a  
1047 geminivirus with a novel nonanucleotide. *Virus Genes* **36**: 539–545.
- 1048 Yoon M, Middleditch MJ, Rikkerink EHA. 2022. A conserved glutamate residue in RPM1-INTERACTING PROTEIN4 is ADP-  
1049 ribosylated by the *Pseudomonas* effector AvrRpm2 to activate RPM1-mediated plant resistance. *Plant Cell*  
1050 koac286.
- 1051 Zhu S, Jeong R-D, Venugopal SC, Lapchuk L, Navarre D, Kachroo A, Kachroo P. 2011. SAG101 Forms a Ternary Complex  
1052 with EDS1 and PAD4 and Is Required for Resistance Signaling against Turnip Crinkle Virus ed. S.-W. Ding. *PLoS*  
1053 *Pathog* **7**: e1002318.
- 1054
